# Supplementary material for: Automated decision support in melanocytic lesion management
Source: PLoS One. 2018 Sep 7;13(9):e0203459. doi: 10.1371/journal.pone.0203459 (PMC6128566; doi:10.1371/journal.pone.0203459)
Supplement: S2 File — (CSV) [file pone.0203459.s002.csv]

1.860192910204319	0.0008165595919031196	0.0008786212790932259	0.00031523001000777163	6.575327826416038	0.00760010160827858	0.007232039632053924	0.002325612754693023	21.311311665527914	0.05868685665856593	0.06408658116602638	0.01733152610692734	62.62856825705354	0.363102188201885	0.37209935936821403	0.09680185460767676	166.78220028318057	2.156364588667054	2.001905462873193	0.4962488070824949	537.6094396243548	11.926009213705841	40.84397430291813	4.02757591329351	1.2716209628141448	0.00012563032811975972	8.377660025037338e-6	-0.0001276683148539612	2.2537140850472483	0.0005820523860126996	-0.00016545574698422237	-0.00008247810718455838	3.6801856205912054	0.0024282450031921383	-0.006778150002948506	-0.000632633822207338	5.5059589483053815	-0.007825600401752937	-0.0036985785946802604	-0.001037228429431521	7.64472071698348	0.0457938193683383	0.12741847146601476	0.005718113817271645	13.834039495322267	-0.1894924780781919	0.8666730425452293	-0.1378400135341805	1.2736662131299559	0.009466474566915798
1.7541119041727684	0.000659007931713276	0.000689739578920967	0.00026485455345384793	6.232307535218777	0.00663507970735737	0.005550887581412967	0.0015811542939529596	20.54425392837303	0.04326534696199711	0.04759539376360345	0.01249664157461018	59.44256405370733	0.27389096877739555	0.28355168503676426	0.09074436491781329	152.9585482337127	1.193675493505632	1.1240291174102521	0.39715740542909955	496.1481872237127	19.34965811244688	11.157188775389477	3.448707507152896	1.2254639125187967	-0.00003856499272071321	0.000013878309396119783	0.000029360222250302892	2.1832903877384875	-0.0004174029544895256	-0.00010722730779845897	-5.358036545427276e-6	3.62302274572396	-0.00042233499324220063	0.0017621789896103027	-0.00008905202626205717	5.325296024874292	-0.005517595200491653	0.021498226109812363	0.0024093782658755067	7.234432974911719	0.020271445122103573	0.007000797738369375	-0.012749840681694444	13.183420834058248	0.938499133792981	0.6526645349638738	0.05085219964717613	1.2272653966181126	0.008095472786954123
1.3237232981969718	0.0003292391842318914	0.00037940130404786373	0.0001483408733163147	4.747178941605816	0.0043863191434311555	0.0032237848393303864	0.0010832578189211607	15.65125069778569	0.03407103953420466	0.023598566541806306	0.008358424108416102	46.99362265317949	0.2244471085000983	0.11786526207130504	0.05768660783334296	117.91163287808645	1.0926678118808337	0.6702003631987966	0.3099564087792391	379.24083439136405	6.67160762670092	5.800151876777977	2.3818745694085943	1.0930196194368857	0.000014419422511560129	-2.3905583455566036e-6	-0.000058559532036545306	1.9658836085178042	5.940190338697304e-6	-0.000027721703578816845	0.00023072742110140102	3.265865823703097	0.001994108165123811	0.0012325472917374299	0.0005566732518645234	4.978426515157813	0.02494543965399281	0.008197785673062674	-0.0022639507331193042	6.502057698353316	0.09663514670457347	-0.026239187900525283	0.04013026154875273	11.157519911333967	0.2540478189811267	0.03160495455558683	-0.012433514249718324	1.094126882991756	0.0054364233394236915
1.3953546754370645	0.0010526425344789387	0.0007726120146194431	0.0003106121696554546	4.664952820558634	0.00867091302189978	0.0059768130772725565	0.002121992533507999	14.053648261052066	0.05903784066752051	0.04047417469916938	0.01401377196768755	40.097859952519784	0.3181358962876017	0.2502634974844551	0.0909587239635692	104.2505642389801	1.7610966110371498	1.4211834088573574	0.45527893415089415	295.60117193578793	31.597861952441093	6.962554434390647	1.3554901693390387	1.076268947337212	0.00015153255379495785	0.0001637494387524477	-0.00001777990132102809	1.8058910786369986	0.00028128914431421514	0.0006231635296188061	0.00016651991816821492	2.7448192824095825	0.0023332275745240132	0.0020145464482814427	-0.001486710831648063	4.000162752155589	0.002519482684245845	-0.016255721840022802	-0.004693186739046478	5.5138374999394175	0.10187690358334188	0.04396283717585679	-0.015087824459191644	9.632464678003783	0.6910502643432997	-0.07863531096531327	0.024492729678847303	1.0787948011021646	0.011386925004594827
0.9387913822727348	0.00048219794393109395	0.0006047565120515496	0.0001904648700430866	3.343606591787864	0.0047124364478923035	0.005014196949990615	0.0015137426737854695	11.12188206688534	0.03751833119533563	0.036874886308714744	0.012670503812868833	33.74899736786973	0.1787689300367516	0.23291713914411263	0.09001763847534894	85.5785067443998	0.9180005164906393	1.0025468480730066	0.3070320551122627	231.66793809673788	5.095537839968962	3.5404925654686883	1.2322308569336335	0.8959905865668064	0.00010101821005930879	-0.00016699045114056788	-0.000012850790729463314	1.6022838483836332	0.0002874335012272981	2.6819672302324663e-6	-0.0003054831922005539	2.692198246729575	0.001964180619209879	-0.003568300101586522	-0.0012103109712277326	4.1652597235914905	0.012547703685297328	-0.0015704417378745027	-0.01251992327998657	5.486290057381411	0.044511599347685234	0.05152722697218225	-0.008435945236217443	7.874242549967802	0.31589365133349995	0.0912429450351302	0.03309916410721743	0.8976168543028381	0.008198142308923231
2.117477283463268	0.0004562289484079608	0.0005641817779271627	0.00017087668166166367	7.631632289690349	0.005411079834048202	0.005071206357805963	0.0014342757594641051	25.635647410189318	0.037667227146526976	0.048954393713181533	0.012864810146335172	77.76216257968197	0.25295183501043444	0.2807140166867696	0.07832478460057961	199.66717119384091	2.8123842629266367	1.516752777346536	0.45290664822549137	580.4327435457382	23.326728333499155	9.079715666641446	1.3601668716562678	1.377355891447892	0.0000822591226392584	0.00004256749763214843	-0.00001009650830055767	2.4881390892701667	0.00004494608265728207	0.0001431018306485524	-0.00020340733989345812	4.2075692958067075	0.0021300702910478932	0.003798514878790055	0.001778258413800167	6.481313976624818	0.01331128864290863	-0.007175210344672602	-0.005065809689972043	8.607945007212114	0.19138497864691462	0.019380982058544674	-0.039390734325921585	13.466128348593465	0.5894068358050331	0.015719161524476256	-0.11644552683038085	1.3787386096167613	0.008305768692362572
1.92502080490452	0.0006502126197849401	0.000825331074834034	0.0002706578832948421	6.931093926173318	0.005652057758985993	0.00693946161322987	0.001897358877984225	22.83934559181815	0.04375469833225582	0.05746515634161857	0.014803606320046266	66.15923421513726	0.2915591599487685	0.41787586578809194	0.11167818026899863	179.8666688190093	3.0933624272383513	2.4835361097662934	0.469085638105748	607.9816383757777	28.000809668502775	15.849198176258435	2.9838700565585814	1.3052879811887996	-8.813996868585128e-6	0.00011169002528757378	-0.0000781041525205155	2.355169245634626	-0.0008311874691999312	-0.0003665023681864182	0.00012984811131867206	3.9051886834432765	0.0027524585291952555	0.0011703876400781478	-0.001110995715736325	5.756088771912461	0.02732015311864584	-0.01568979687831458	-0.0029795139359392406	8.223685416624775	0.015599716703611615	-0.09825419164284098	0.01890955830810376	15.205507245265318	0.7200421892706684	0.5562247557926558	-0.03276773551794264	1.3070673429698012	0.007041845536145367
1.9194965730523303	0.0004917785310563482	0.0005956906560122871	0.0001673314876111699	7.012950837832652	0.004584441337213335	0.004909655893074373	0.0013017478555536971	24.041743008915287	0.03732809147790409	0.03797426960165643	0.010195424917762562	73.58547066734019	0.3298419547190025	0.23587676574614663	0.07298374945581025	190.68376677705257	2.900972949374318	1.1534908429770412	0.2889318813270935	642.523529226999	20.184572808381354	15.713191259298956	2.7798576497212037	1.3246746437734718	-0.000046627713584209286	-0.000022161935360746448	0.00001213519370259309	2.4244909554408247	0.000013324636784420678	-0.0006415324747526133	0.00011746327129895751	4.177586886780047	0.0018110557774721717	0.0008800361724400571	-0.0017099170433658142	6.482607526646103	0.004047433056562241	0.020184232774485396	0.009914124070305801	8.757535074554129	0.14221761392157356	-0.040106460442758396	0.008691529145881725	15.876584112680638	0.5726465965740277	0.5532238394290383	-0.061396490560226544	1.325976488605681	0.007006756503918461
1.9186373824038279	0.0004166524323295833	0.0005296644019961368	0.00017788570871185265	6.966899986059127	0.003853432605297937	0.00436909977286248	0.00110528940736478	23.712064801638448	0.02974257226820048	0.03130689144969063	0.008713803050890498	72.44702129882681	0.15463401748929645	0.1942865845476778	0.06277689516747006	174.8877159544207	0.7354342650015983	0.923801835428011	0.2982810482972231	462.4424015108845	10.459979554974788	10.747600483660124	2.1101040639143887	1.3137685178518475	-0.00003082573275432499	-0.00007137879216790047	0.000013899532835360317	2.389305224569364	0.0000888039920584475	-0.00007453051861029187	0.0001715152276624367	4.0825180663873155	0.002923250088111764	-0.0026771523907800697	-0.0008895923586078854	6.2930172237401925	-0.0028482883015698785	0.007969494103802405	0.0026653627550616795	7.795149228024028	0.02630424490165334	-0.01114993305530491	-0.002168055705421949	11.298767132028495	0.21864184518074958	0.2215165220412848	-0.0627876421544959	1.314996984365987	0.0060360518097624435
1.403738064828231	0.0007776020907474224	0.0006519281861647791	0.0002918710526172419	4.991276593040867	0.009312709077022767	0.006030185663139499	0.001611656466830163	16.480737830023557	0.050529135342464324	0.04009859168424392	0.012692093963581447	51.27504405923161	0.3867150794837866	0.2542519280553135	0.08895972114758308	152.12651393926478	3.121630581317928	0.9972411027365063	0.5899320213666861	507.08691913461354	13.719447078763617	10.577963921020306	3.3538607765964557	1.112564712134107	-0.00008094982520523321	0.00009700350493321249	0.00003533952141390489	1.9871118065193383	-0.0006402040996206651	0.0004830278420079432	-0.00001671272754562674	3.312630877429026	0.0007205657325667796	0.002849049632201408	-0.00003674240324163033	5.254206980816635	0.016211770777132224	-0.003790631049917431	0.004986562259066224	8.103468466142367	0.16535213535959847	0.03723247588553787	0.02985809277732437	14.245355337144785	0.5112828067180738	0.02192829622813368	-0.11698265810501464	1.1143218000217756	0.0074070882244823555
2.3992416290310463	0.0005100505565677013	0.0005595983583482977	0.00020835334466083163	8.84347951536732	0.00508692447864947	0.004521874522740273	0.0014114330053425841	30.312529777555223	0.04684705452590107	0.03135873131465037	0.011497097999636876	92.21895133759755	0.30385317776855036	0.25015945412794566	0.08779223802533553	254.12142880853858	2.7809499623320435	1.1849195531075907	0.4500040094175803	782.4642460998103	13.481183337874118	25.482597140805396	2.037775030627791	1.4843971929453899	-0.0000460718403815231	-0.00008339688030666063	0.00004728482205976997	2.7402631146670933	0.00022276501956224986	0.0003715437976524778	-0.00008651320352961809	4.717569893285335	0.001969452675911097	0.0026715066971980967	-0.000781566245529413	7.258655180524707	0.026459878893897098	-0.0035797783815953214	0.0076906335974971565	10.364431596191634	0.0941017357787826	0.0518088057325667	-0.012911550397738008	17.225027417107924	0.2900250712302318	0.6122716634212734	0.04983709566065597	1.4856982226017392	0.005472068151899392
0.917676861466724	0.000996307664413243	0.001944953608472138	0.0003390246583846637	3.1862834212074174	0.02099787586394099	0.013239054851099365	0.0025391566311245783	10.328003024336061	0.05073069738546573	0.11898758997026639	0.01663231782967476	32.65709411405646	0.23388247065848314	0.38212497451404814	0.07869174210354883	92.13874944869734	0.8961385319947727	1.688585539785011	0.28276753963168894	333.177287978302	3.9912451778391413	14.96478030082012	1.2806439978734832	0.8844154805572384	-0.0006827669209116764	0.0005347708192001487	-0.0001060288109145265	1.5573694062175012	-0.004238303305429651	0.006396407826458831	-0.00010211606434352276	2.5844237245771216	0.009799569431319752	0.00027150851076619545	0.0006633683922887972	4.188372980611461	-0.015765490870994953	0.02442115974742076	0.0018631831308876163	6.192680001793775	0.0064982556610940325	-0.12998371840766693	0.022415573092111302	12.454068356268731	-0.04317359319512511	0.6580769315453384	0.10260647714320015	0.8878833983296569	0.012246564316354118
1.457835629206021	0.00039802278061222925	0.0004560024855230021	0.00014586547660162553	5.272063027873829	0.003954334881014789	0.004075296863111438	0.0011584397136511259	17.76811667466649	0.03164639541663377	0.02682217872790465	0.009046896708796083	54.45578113206341	0.21513185847327318	0.2002843000651001	0.06764400320097187	139.18318284502024	1.729163097730044	0.8422683344050699	0.29231132817395283	361.02384849199984	15.15962298807032	5.670230858260123	1.2923843815430132	1.1447446223388846	0.00008628374211359119	0.00003550212002213937	0.00004866625238013549	2.0745287213650476	0.00017636713968406355	-0.0004762512505138261	-0.0003633118095921622	3.5148437728041766	0.0025377659898848637	0.002031842325385908	0.00027678597784309083	5.456589947826458	0.009413231720932827	0.004947362400099813	0.0003894638682015437	7.167447335505049	0.08384546129271755	-0.01573995626780677	0.006299298085549876	10.119195726625547	0.43831370603054265	0.08031600128041301	-0.06919535571237541	1.146036336548059	0.007503508824033921
2.5671024850874966	0.000512264236813371	0.0006086544178345346	0.00020392991674617072	9.392830061468404	0.005429340803959942	0.004966615767982485	0.0013506414285080622	32.320660164583806	0.03705876289020615	0.04305262057708588	0.010592135237613239	99.86064988277552	0.2525912415450938	0.22404664633733354	0.09457715256566225	255.84589847670816	1.7011527021983184	1.042329651662224	0.3398041947639069	789.9374239680392	18.659999647835686	13.746725703226799	3.489263803164298	1.5328860343546014	0.0000680791676256759	0.00007403846092652233	0.00006360386728501722	2.8097224287696245	0.0005590177431004744	-0.000037321320424376144	0.000018623101791748575	4.856841879430115	0.002086062484420881	0.0021687403802903922	-0.00039896170333409943	7.578527004175829	0.00371300501611599	0.006434686977801327	-0.00042083910678283366	10.018074363447546	0.1115773791939977	0.027910567331476777	0.021837568117807953	16.516995343093143	0.8188710814049203	0.39131118940584536	0.03196743916402348	1.5341619730745606	0.005916593907087893
1.4198528561886368	0.0005760224686608826	0.0007363352066032697	0.00022177899616278497	4.994043199673908	0.00452470623433196	0.005926408775806344	0.0017712751955857356	15.814139301038118	0.029617397898007682	0.04230406889148272	0.012971985280487338	42.62274511046034	0.15543456955058552	0.2573387561281049	0.07642007629958239	99.43721968411054	1.05589382547079	2.1546154692605315	0.3821277942923599	276.81543276856195	7.373101065547927	6.752349077963541	1.4082317912680877	1.111458882646861	-0.0000696050378520391	-0.0000355234053273187	-4.416181198582693e-6	1.9601202692164497	-0.0006472106588999961	-0.00019119301419227212	-0.00018052135757465955	3.123092042188583	0.0010092825459433131	0.00047237436333071514	0.0005371647037130136	4.26297162235727	0.0074984479222762156	0.0025983952539538357	0.020810534707645913	5.197694742994726	0.0075178355105998676	0.02187562083215749	-0.02226746627220502	7.847395397377413	0.1657444654652081	-0.10217789030987237	0.04946684006769505	1.1132215227390914	0.010373565708177952
2.081990496297346	0.0005377725739510876	0.0007193003524387199	0.0002034104654705291	7.672717071696925	0.00834069054203941	0.005717965495264152	0.001511851800046218	26.6495314170673	0.047521041202106984	0.04115844100317247	0.012918505928928795	83.12687516429844	0.31595487864394634	0.32400171175880277	0.08165691268953655	212.27257092326627	1.6565094830130846	1.3582376068713642	0.35326711086570367	602.6869522153477	14.013329741444574	10.81803015651999	2.5604121072345167	1.3797046776061133	0.00004474883929895332	-5.6673102034732e-6	-0.00007097856728748996	2.5499018867216354	0.0003756940583582574	0.00026920891671924056	0.0000652665629111063	4.455893247289865	0.00802789129733459	-0.004068844800640444	0.00021777761344938357	7.040028360844083	0.009378468772242188	0.01920121641122643	-0.005364585568437189	9.267520238191665	0.09819130851253385	0.0037257799235592692	0.018532298314764658	14.071194304996954	0.46882041021650495	0.30327553804326074	-0.024294003587274453	1.3811737171273386	0.0062891867119865335
2.786466916990332	0.0009168440460781155	0.0009710630639160263	0.00035290537702583447	10.115833458942163	0.007813011766114127	0.00854128400895175	0.0025324844897485405	34.27933265410057	0.06399273893751811	0.06675568063494527	0.022108516569837013	104.83708722394854	0.6433655611418119	0.5090359322816935	0.14879206604463166	276.56060107496376	4.0767683178370175	2.427117873986792	1.0026550692308995	831.9732209753585	24.011280469311608	23.251725127788617	3.0547398654956375	1.5755091823551834	-0.00004656925342080544	-0.00004223928035342324	-0.000023294101365614976	2.8658271868554794	0.00007640741939703258	-0.000314956319523952	0.0003111721185982883	4.883758128256279	-0.0001667064577872418	0.001562571209959739	0.0014702258936280797	7.600345973679175	0.012604724978503679	-0.02742191146329296	-0.0011442190068554846	10.51683609197383	0.18158990049240323	-0.07521240928238765	-0.04489738415207861	16.922872670933636	0.2589949717160023	0.9505652248166533	-0.10400875506216661	1.5775735169759828	0.007618686320618955
1.7154815241975219	0.000509765472690573	0.000552102246682552	0.00015219531555104462	6.211160771883894	0.004543467161176751	0.004994343804621537	0.0015161807560051695	21.02322323880529	0.03233876095785107	0.037713983591152474	0.012354054486869518	63.91167738520574	0.1962885548633839	0.21297164768969867	0.07084212927018206	160.28363869151565	1.4733979741645964	1.1455564988479972	0.3423879339113883	440.3271181045962	17.133660716188363	5.046480730226594	1.1139297416088147	1.241897701886622	2.4473765551993173e-6	0.00006877797169199879	-0.000022656020017400987	2.2528858572955826	0.00041454174900967854	-0.0003041896142815037	-0.0002725108327473632	3.8318862217855973	0.0014701534993140815	0.002723649111920858	-0.001132516963814291	5.895925194778684	0.011422223387939268	-0.017723414931181583	0.005572775127844165	7.607170182487113	0.08433058486173618	0.004651824345680302	0.013088295234826648	11.445871592816477	0.5473173673469516	0.10268841771519857	0.004796359591863121	1.2430425909404028	0.01163691800783199
2.678957965185628	0.000710462567628831	0.001015313457933373	0.0003319636580301654	9.742746420245028	0.00568296596887036	0.008794023091342789	0.002270451836905715	33.052341453717844	0.04878109711239215	0.06488303956080317	0.01861098734163108	96.46955881424344	0.3719820902184551	0.4723720685776054	0.1183532316054857	261.7841570300393	2.3976272782701615	2.4664458433837155	0.7138822699442235	773.3724973085409	20.9756511019206	26.35629686714578	2.7821484387742563	1.5507356866004862	0.000028623456434639833	0.00009541980878524829	-0.000012265809253864753	2.8249045380077766	-0.0005801087200351755	-0.0005091674958223743	0.00008295405194014138	4.812887395328447	0.0018139057793199308	0.004056754219529069	0.0006102538511733206	7.110755844522393	0.005975346504580399	-0.018604380260978756	-0.007411585268145755	10.004932962153285	0.20459380518282141	-0.041371435484287365	-0.004000134347173491	16.03171379374326	0.5435363155130921	0.7602918745303369	-0.05000034061705112	1.5526324956473938	0.007268470259913613
1.8420256037443234	0.0008011836004139137	0.0008364063684846443	0.0002962259509583564	6.640970865000745	0.007966382578589679	0.009616774300834342	0.0022455296185668852	22.19106099817143	0.057255841676627034	0.0634634493437562	0.020262942188805238	67.51722624370554	0.2798030921814552	0.38085351363368963	0.11672098559861444	186.95281470170983	1.4712466230403578	2.042888239870362	0.6294086580579542	531.4414871178321	13.076206239972	12.99426706412244	1.9267954550290822	1.2714855517446353	-0.000038822411947346476	-0.00005962127255532988	0.000015209898838614308	2.3003741048108686	0.0005935657348629648	0.00009099161354395881	-0.00009467665746447293	3.876795557957275	0.0024768460079702933	0.003930100667828838	0.0008039917536503807	5.9941797543232225	0.0034458852805468883	0.0018435940443361104	-0.009717829237959158	8.639513628467306	0.016232073222199682	0.05964871945231401	-0.0032804125140165974	13.374482092453217	-0.018145539725659927	0.3253902111079336	-0.06982948340848417	1.2734509763664055	0.008921466407970929
2.299979011086494	0.0008188211523567472	0.001077929381418287	0.0003334159256910826	8.247985779811973	0.008037970653787124	0.008597312244207499	0.002420980601513854	27.421871366121824	0.07678322648349781	0.0567044916903322	0.01945035973819007	80.90504509573393	0.5140564814661681	0.4559123312392145	0.11410740255384448	214.42348071343744	3.070719777089002	2.7274299990811945	0.643958802839509	444.5580769055404	14.5624910111568	12.945163734310478	1.9959142511005659	1.4305440425617395	-0.00019223889856610302	0.000029275615202955666	-0.00005918316770505384	2.5718270280537467	-0.00013615626748617954	-0.0004800704350999713	-0.00016524747363688388	4.301851063774192	0.006714809418318365	-0.002198744752448124	0.0029660338115710936	6.443207063312989	0.017567581618988148	0.018401972162189806	0.001885021739664619	8.807194093410493	0.0863012429563554	0.16322086515960568	0.009279444656178592	9.996618151748063	0.3141082232282453	-0.2089377664922209	-0.02912705496215045	1.4325069243579251	0.007902796761176547
1.5679508329728349	0.0004045913648770171	0.0006950488196666687	0.00017585408516943308	5.760369192971443	0.005028856351404012	0.006115862618423359	0.0014383142394715405	19.7054539184817	0.036151935250537386	0.042327095725424035	0.010705686555978375	60.476187865232575	0.19713903015466128	0.3268408153027879	0.05890284785438072	152.7852198347739	0.813088745538113	1.5658959497428824	0.2806462084520849	394.18845226565924	8.466045038643546	5.986403758345383	2.6265575628182947	1.1882759256206092	0.00009984311590308044	0.000146887859156653	-0.00004835381657728998	2.18873440351166	0.00018006068990463405	-0.000406570020288072	0.00029571242713578877	3.766751033771111	0.00008280044847965	0.0017382659505432944	0.00015986748264886622	5.8579067876170505	-0.007255919084626686	0.016148119811414337	0.005594746637368691	7.628554757718676	0.021932932302410838	0.09254710166211355	-0.008872696799318834	10.73438515962169	0.37956955268590215	-0.021309292685589985	-0.007599528592266728	1.1896960143992958	0.006814387610792313
1.2075009653291047	0.0004864928065269985	0.0006026466074323034	0.00015356415032845319	4.406085987754571	0.005112938526517459	0.005593554523080699	0.0013825492215946273	15.061947227181436	0.03389642602391659	0.040590354295614924	0.012051532638339607	46.677253867533636	0.18594933392231944	0.29065672817888805	0.0699157757963393	112.8962257601802	1.297534389846885	0.8633518804202446	0.22756193392832677	355.7623284847876	10.936934433170904	5.681928525812081	1.34265545018083	1.0383394994944208	0.00003333083561136605	8.05330606808263e-6	-0.000023160612103432297	1.9005882616200764	-9.039619905702184e-6	-0.00015995979786808916	0.00009917294658979482	3.2721501444388434	0.0032935724792010376	0.003606132677167467	-0.0005064701547468582	5.151690543927395	-0.017901933054913447	-0.022854668597818862	0.0020720898273504456	6.50551120494631	0.039462215359065016	0.007543457156898144	-0.019101312664219598	10.807393830619608	0.22424172179814622	0.18607232471397853	-0.06345407549143317	1.0397585580076807	0.00836283910694489
1.3632580701702661	0.0003362439492286131	0.0005361709042128808	0.00015468797828643334	4.934360465954309	0.0032657280459997074	0.004510087496890206	0.0012085344605403008	16.38008719432356	0.02358393467654217	0.0361400322925084	0.010204222231588442	50.333089636876366	0.16062952123468566	0.2013706389426852	0.0737914813910868	130.91319975733956	1.727252767009272	1.0794961321167875	0.30802457592457716	354.10581955895356	17.586361970103795	8.638262421578847	2.024081974088795	1.1054165607765825	0.000010646309843656162	-0.00015233720490346987	-0.000060643996927630944	2.0051502627803193	0.0002669712824036808	-8.520352319920844e-6	0.0003160853501275041	3.3469946701074167	-0.00004799589383980733	-0.0022365326777788156	0.00033281191965501975	5.209465033102206	0.02051686589077219	-0.01552726254794631	-0.0020300154611925516	6.994120968949437	0.11799716554913933	0.05693503439833815	-0.02452472280221554	10.43243230545367	0.5745961295554988	-0.48346008189429046	-0.04513010303134772	1.106580902194788	0.006387093747758676
2.4073931776669766	0.0004870653129186217	0.0008465615010835561	0.0001929997695157334	8.783169956756433	0.0043012784873751354	0.007913400847442478	0.0017717251498650432	29.97298722604367	0.045631760575172736	0.06874686645650561	0.01503851862517015	92.3659589515623	0.3197706181981438	0.5176893289297286	0.12037499281007694	240.4607803379724	2.597981492758226	1.8231957160355918	0.4962281515777585	669.3773590026228	23.65865106090297	7.279003799068041	1.471551686160014	1.4693835471617527	0.00019371749701437458	0.00013395813127484692	-0.00010305713266303931	2.6857759953483336	0.00011178301955442394	0.0006739776060478894	0.00005407304555305411	4.610598639708096	0.0024875030763837655	-0.0006858867697736187	0.0007641581030381734	7.218222276414547	0.03678378964269004	0.0369895609795236	0.007736685895930602	9.704800115650638	0.18447472135186124	-0.14722086057918235	-0.012737678902216193	14.464185400906507	0.6936105385644556	0.11470553719592774	0.10307205357434684	1.4708514012394318	0.008215301634713493
1.8397099752089592	0.00044499694195207555	0.0006485366922413564	0.00017989730619494718	6.635595828243228	0.003436717807615089	0.006201823029506764	0.0014502781250093498	22.16368503339937	0.029135229981668058	0.04867485934549093	0.011281700152625248	67.54341629726089	0.17084812996937224	0.21986653929334454	0.07079129289118205	168.1480182181512	2.1752434035564283	1.1459243944570257	0.3088988184506973	468.62438723881576	17.77580302927658	5.293420821319483	1.1826665295256018	1.2811647537805673	-0.00008453872732414149	0.000035120302371171046	-1.4125433117502056e-6	2.314798953963131	-0.00009449831208165012	0.00018463494383447868	0.00006921704503216539	3.8866067807941866	3.3006075326168056e-6	0.0012234062685885236	-0.00024971139847558316	5.99673901893813	0.008543841835884365	-0.016680607418514355	-0.00038376133142004255	7.736504099806519	0.12263395211988423	-0.03448176139069022	-0.007100705179911021	11.679842449616125	0.4163684100256468	0.2532720072586358	-0.01725162408647613	1.2825162778158312	0.007882511697480669
2.3671954283688996	0.0004008701853942657	0.0006839990826158389	0.0001430477212641605	8.59385263596126	0.0041051865290115865	0.005646751674873666	0.0012067701893967479	29.17631909747895	0.0277213765515624	0.03930738679033697	0.008530686801176716	90.36276169013837	0.17599223884884554	0.32810762927397263	0.060231554117242576	234.23994248594687	1.5538186977120045	1.6690337673784432	0.35937140288712416	650.0049132955884	24.31999455269468	17.69069024036277	4.049313639617871	1.4701921777327633	0.00006160390125096113	-0.00006054252005553637	0.00005320329952506328	2.673374485200191	-0.00027280647029654726	0.0006033198780943244	0.00005760850632001344	4.55592186344459	0.00022426132749397518	-0.0018100093308151839	-0.00044361703019140937	7.129957847349847	0.0008092306961829299	-0.03225349323075536	-0.007423826811920156	9.495601454605353	0.09662183015498674	0.058081982574654537	0.0020240571390901137	14.259877372835442	0.5288653954506779	0.5732383190744963	0.06351147906440288	1.4715263692988407	0.007418803029867108
2.669004021428395	0.000664494121444865	0.0006629980234755016	0.00022005219655675727	9.803647750856447	0.00890485265958911	0.005513536751020708	0.0017016253177435559	33.683751311033696	0.07358742481534017	0.04841519432097027	0.0161022937085663	103.29959667603883	0.4704579083354179	0.3628875824950944	0.12376364676926448	270.34543742514944	3.3040376091464343	1.6831275395428984	0.5419537649722311	898.0600557134998	22.134150482097322	30.66357941638729	4.889838229479588	1.5651464511399467	0.00002206668689298	-0.0000338395158147906	-0.000023114377796588006	2.880853728781823	0.00020604336629610892	-0.00041195347808126815	-0.000024091758770134875	4.976228376350749	0.002115469891257265	0.0012496694107099059	-0.00022696806744581824	7.726142691831302	0.007585668457276575	-0.0031670904427736936	0.0013232153634359356	10.455453014481973	0.1542321050991818	0.014130711203705926	0.015646581086848802	18.653197029569935	0.45879203337911134	0.5643557168456295	-0.06192358772071852	1.5666482949294942	0.00751021712051674
1.847205538547761	0.00046957383668635826	0.00042550814673803877	0.00015443200757562882	6.743228009785546	0.00466733358180171	0.003421781825862697	0.0011341490546599143	22.69376815169672	0.03009756983353307	0.026993222514661352	0.009149869847856729	71.45491865960767	0.2783181289759152	0.17910869193174042	0.06498900245230506	209.60218671473183	3.036187360356957	1.5369054420737511	0.5692295941178507	735.8428983253243	26.791775679299988	28.461105847575194	2.2133328404094175	1.3046313757535	0.0001278417406959732	0.00004742346227024238	0.000031078486629914726	2.3853439526498397	0.00021464226213906062	0.0004989645470589746	-0.0002654002127330646	4.03287329984383	0.0018294782253933655	-0.00002488595155842113	-0.0002615112289215828	6.443933810626209	0.030794928772121196	0.005210263738159473	0.0019227708676901384	9.875654362748369	0.1891255691075278	0.10767160741578483	-0.014664466947705245	18.793119143197	0.5775209199193814	0.7454672876696922	0.014499340927884186	1.3057935264506524	0.005728622760288835
1.9301465264358075	0.00042376790781346754	0.0006528391071980005	0.00014535745577921085	6.910437064644258	0.004656962154924856	0.005294624567912725	0.0010826161950877847	23.14462219871689	0.029069736118508983	0.03850705127535254	0.0077744027791659485	70.84425600875375	0.18052715873605638	0.2518480194611709	0.05828726376619995	173.69437435304206	1.907902391515596	1.9815417874478451	0.49433188761433133	474.84416346389776	8.907989587118351	16.681161075666537	4.558879559971544	1.3103491068012834	-0.000058953796331805676	-0.0001810559484303091	-0.00006311171942283147	2.3503760363534556	0.00008124696356958197	-0.00009259638516039896	-0.0001100440599479778	3.9542661625888074	0.003083460701432609	0.0021758266690725878	0.0008883009201195672	6.117166476736544	0.0009926748623331877	-0.005076809532965821	-0.002195058427521258	7.802018583438979	0.0508737022909863	-0.07531661450735257	-0.00537264818966472	11.680686555668931	0.14285976119082003	0.11125254315327973	0.060468912585711874	1.3119567399361922	0.006859378110757761
1.9496885551940597	0.0005787953863609797	0.0007785776598591121	0.0002606687695406746	6.950940207500352	0.005274487918474733	0.007131348027675122	0.0018457640805601614	22.524176695377463	0.035349583896830405	0.05116200122360594	0.013974553265384571	61.242580738526684	0.21093836982513522	0.3306132963499365	0.09957402732519136	150.2738148538536	1.1314564380748702	1.473849972133816	0.5383200984844978	520.8330457890414	17.214716364207987	19.243261357639128	4.490124252921429	1.31375134343485	-0.00006186986128009363	0.00009251074770763141	-0.000032393669125879426	2.3471476233714674	-0.00007141543248315643	-0.000401807530479389	0.00006863822417711428	3.8226761130026787	-0.0006310349146226403	0.0002643672586821101	0.0015398288832806474	5.2620665496498065	0.006642677936274997	-0.021261691961816546	-0.013560210623725422	6.744887671544363	-0.0576860670704814	0.07874400955336652	0.002377418249620596	13.250627690547601	0.6427502092612775	0.5096413377513048	0.22918386284797737	1.315422243736417	0.007271317168177477
1.3921940352551792	0.0004538735135215611	0.0006013122738532902	0.00017408296374933884	4.984423505096536	0.0037901961112966837	0.005478877535953169	0.0014400211558166021	16.48361352638009	0.028775094367534983	0.043471142468182095	0.010664386451655473	50.09389552418618	0.19493579745498937	0.2898320205184685	0.08543026568076921	122.98368616869614	0.8836917436352246	1.3271795544913285	0.2909876204169014	311.9427842182374	5.88625814070886	5.546074863228276	0.7937186487181985	1.1082401818159877	-0.00007786657536469533	0.00005814362607584516	-0.00011376494244408603	1.9888845756307254	-0.00028309799388592864	-0.00042384605698929145	0.000330780880665972	3.3106317133694096	0.0001434594430848104	-0.0020619035707967206	0.0012387144286648416	5.111916270800389	0.011311136719591242	0.016615396184265614	-0.0009489998125696355	6.509205278938644	0.07263135735244815	0.005104423897831196	-0.040147625306742124	9.159790723977382	0.26084383840800146	-0.08975735671906497	-0.021491312709168372	1.109700919220196	0.007930522284590253
1.8674647794417694	0.0006115092548427718	0.0007028863836982659	0.0002736774135163213	6.41923124044977	0.006901210383370767	0.005614545714915884	0.0022642608413575766	19.673097060211013	0.04292445950653197	0.033133802220380267	0.015235113010505173	50.807610837169904	0.2272509701583275	0.2392370175586971	0.08315268565444484	115.82512316548859	1.2259388076863293	1.0869757098934947	0.4001648170385223	356.0192019484848	13.240429331841579	9.168023028280373	2.952262925471916	1.268727776292806	0.00008876518105114883	0.00009061487538424729	-0.0000491672424995292	2.1874978512360523	0.0004345725807620806	-0.00036031285622403357	-0.00044580147891609104	3.375610953858738	0.001949253600501182	0.004064116696557627	0.0024112326203569057	4.426968210459094	0.00015057879430593763	-0.01908788516515583	0.005572293237966748	5.223547946015375	0.04689911121685585	0.040710800757731085	-0.01699165575608418	9.003442122488106	0.3995903240133797	-0.14603819131015383	0.04055512893001528	1.2704250773508234	0.009495676644201019
1.0862669230732964	0.0004393204618331495	0.0004566585479719964	0.00011412510777090741	3.960036099348231	0.004049103363177812	0.003880635599686485	0.0013254832605224828	13.469423990561308	0.020264725768071014	0.02872380492928277	0.009905081637689666	40.75666368658289	0.132388275301031	0.23234023919968172	0.05049140093624928	106.34310052135213	1.08947394012762	0.9348374389351898	0.25403096623652227	265.7507309996707	11.63493347846336	5.192829806053145	2.77951207712198	0.984636357204156	0.00002019307834642142	0.000051861304556956135	-7.897880285140883e-6	1.7993758568211333	0.00010003217465689952	0.00028551666446189	0.00008597031633112634	3.0764231611635533	0.0010693636568676692	-0.00021679919293632837	0.0005226473078986593	4.7127424370973205	0.013398753467305555	-0.019419316488079454	0.002978007921894734	6.272299324640352	0.09736686027972398	0.078108501060259	0.0127398727268293	8.571327880964834	0.27699731993083293	0.34689162112106997	0.024926928623048687	0.9855510281365627	0.011779535956495994
1.8406698531121988	0.0005272046803759065	0.0005378837916906697	0.00019427235248718001	6.554601677284522	0.004850597744144017	0.004642988424566296	0.0013347041357353853	21.7128138896435	0.04523882405990199	0.03379797350846579	0.011047412129211459	64.8799995285437	0.3059185649852983	0.2500074047424385	0.07744190145940168	159.80519384509282	1.9223888707874384	1.0245060727829174	0.5049865254032532	399.57473842874174	7.148194743080508	8.65025027635782	2.2370246149838375	1.2827407950656322	9.494669143981673e-6	-0.000011501949974906611	0.00011409054575815317	2.288790098972467	0.00025589264327911945	0.0003416027474189622	-0.00018350350614802834	3.8137274472297107	0.001191252726442793	-0.0030156995549720607	0.0005083405091080529	5.776263997269399	0.029881417314923494	-0.011992235233235038	0.0047092798356857994	7.335793483833934	0.11540739902189964	0.006858964224891202	0.008176062215913951	9.834459660806425	0.23647444135963208	0.19244013093871692	0.007527675732712628	1.2842853426190932	0.007516484583160367
1.3807842568862592	0.000434982959820286	0.0005814410264387574	0.00014372567337291573	4.977686602573424	0.005005294460864975	0.005491200387615187	0.0013504956901813248	16.65906807151156	0.031736562814808286	0.034235657508647606	0.009676570258310011	49.459377388644896	0.17930527838646226	0.23019495769138265	0.07694586737747214	123.50533496760661	1.0062495109584118	1.4056082428144663	0.40077346658225804	291.0258597601828	6.688474872149156	5.558850861571731	2.496602983749341	1.1096825502232728	0.000034933110779928	-0.000057233366406206305	-0.00006135258284367357	2.0059497317515027	-0.00010636872217917986	-0.0000860582820579964	-0.0003440881874240365	3.3763989665994845	0.002442884379756682	-0.0010391470076932998	-0.00009455704315099174	5.076853052537571	0.008997360136529782	0.01280557541458685	-0.0061057848233613266	6.50125166332523	0.03619402538956255	0.04202401675672794	0.010328333817006834	8.253670654617249	0.14776707950421145	-0.05989749280261795	0.013178369899703399	1.1110312454617166	0.008709037308529037
2.3151599106942324	0.0005295826441574208	0.0006108409237976742	0.00020646722614116358	8.473898643503661	0.005297498636818743	0.00472173313876343	0.0014878954030792578	28.827852188508853	0.042679964102821544	0.048911434696065695	0.011742335771595806	85.48688761961044	0.22767628513613966	0.29267280276048835	0.08457986743993084	240.65128504314518	1.8485302280809726	0.9876495368392073	0.36679307379444726	733.13509234652	19.19840643609655	26.61372403381361	3.064254621122357	1.4574267645107657	-0.00004686227397906088	-0.00003697120827886521	-0.00004598874324530131	2.671549123191652	0.0003658464588330606	-0.00006318590067776195	-0.0004477839441560625	4.5653488406939235	0.0017028992933561915	0.0035353630690152854	-0.0011402758831142513	6.847546850901262	0.02449024603558378	-0.01567531633309709	0.012378669359364	9.959449165182567	0.13333022993816693	-0.05918550506458786	0.047114832705704254	16.49329504429252	0.6047744443908927	0.7335676298356372	0.035350316039492395	1.4587992406992676	0.00560253324571544
1.8616693443352592	0.0003514704716784603	0.0005127278376238751	0.0001687681214822251	6.791623428070117	0.0038476182933377414	0.004307226963810216	0.0013827176041320496	23.027226064578922	0.030196201692935562	0.03431637016878902	0.013274207202451475	66.57308336661397	0.19288471616645117	0.19943237698371338	0.07423556908757173	175.31520332571293	2.0782850863272313	1.3777460087434656	0.3341332031703613	591.2368392869065	15.863070248250272	26.156309714819205	3.300800048352644	1.302127773996168	-0.000013291692818380021	0.00005328590930138775	9.586862361440555e-6	2.3795997769914843	-0.00005637435352019752	0.00024510714322970267	0.0001890289888140566	4.054671847587618	0.0008862199712420426	-0.0001684903719818767	0.0004982808747199798	5.93365870827971	0.023972349499089083	-0.00020766605576941002	-0.0006998151944911353	8.092441517390752	0.12076851614938845	0.09741448713444992	0.004065648530147588	14.82485246737933	0.587924083053362	0.3133653673760624	0.005042415535814361	1.3033439741353507	0.00606084422882237
1.8808621926001374	0.00048196857673441174	0.0006092071461056375	0.00018053584087184931	6.8789560306275295	0.007353405970849459	0.005035027725532817	0.0014568804909333214	23.65227327313042	0.052126290893064	0.0445734294745606	0.012421031427255754	74.45312477155883	0.33548165594298945	0.23088443928079735	0.08976862712317922	193.35977433419345	1.764282116453635	1.0870504006036428	0.42580943363647955	561.9991808500156	11.448214863882814	7.4033267218208065	2.809444342793408	1.307072587885289	0.00003715610892759869	-4.10537865217969e-6	-0.00003135750613987376	2.397904359270466	0.0005684002857377678	-0.00009734017653835624	-0.00002260660017083713	4.154729840057573	0.003943207193810755	0.0025663394423116443	-0.000733445479148895	6.635561337444018	0.028992924968838506	-0.006028608156072506	-0.0017924012442647904	8.897249856026232	0.11795955275569932	0.012290197757148506	-0.01140482655137464	13.862317651696337	0.42421383888550224	0.29140023914151003	-0.010532454228647703	1.308393917328958	0.006691916589344274
1.6131416339328366	0.00040976846490167415	0.0005942260244614856	0.00012643977665974517	5.768709875802863	0.005279216633861513	0.00650596571488167	0.001628344044490774	18.532502776907513	0.02901018867077426	0.03906613941695666	0.012976793251214353	54.85331747461771	0.1438379793346554	0.18325829769543833	0.055930891515590934	135.70317949323967	1.009399129287161	0.9854107890387338	0.24243266624723728	351.25760510680334	5.88438937819982	7.476801159175207	2.017935915475166	1.190753236605359	0.00004513513152364371	0.00002858327859445739	6.320867609296429e-6	2.1360295150136195	0.0002314433620974326	0.000248475536402888	0.0003516064498837257	3.4540091402951143	-0.0005384420047619537	0.0006374032825761307	0.0006789030518699335	5.166456293338321	-0.001982573371946957	-0.008785752837649676	0.0030303216067162192	6.544415539335143	0.061174445989056005	0.0008011922854012419	0.006607443956140223	9.171221407547472	0.26062301266385757	0.023223488827962505	0.07191095899130719	1.1919051125647264	0.011836643559829737
1.986645702090788	0.0004746319427684321	0.0006125764075004087	0.00017038912972912773	7.261155444882949	0.004563539147852802	0.005283564800967618	0.001176895352880003	24.905726523712314	0.031911073623531044	0.037430966268032176	0.010173504746553524	77.75684385897608	0.19804347889546026	0.2672848864099107	0.07397590414361024	201.01873909603532	2.6649962648799135	1.5847522845958513	0.5155983944431348	517.5736514334186	16.623591945419346	8.600759041978181	2.389632362330281	1.337441249337305	0.00009348124043007787	0.0000939353416652003	0.00001899222138064773	2.4487209718710865	6.694303338255629e-6	-0.0002863073492193272	0.00019045391695886335	4.219087284167092	0.0003429291096875852	-0.0007970137924566808	0.000870519847409091	6.667131662010002	-0.0008782087044901923	0.0038380807590046267	-0.008821506985587545	8.939452813842124	0.1209363981218492	0.026431030441998314	-0.02531673009899747	12.702330741934468	0.4934764481089519	0.03482493520677756	0.020915289329671374	1.3387278057144836	0.005885581622100326
2.612747865137786	0.0005689795381697015	0.0005272813555940081	0.00019911442278610736	9.540777209384713	0.006116473791916632	0.004636663052841017	0.001395412091049046	32.00845270964239	0.04883963368784138	0.03889445267327186	0.010862587716200332	98.27624933202131	0.3180555196767592	0.2287416657202238	0.06914599426689652	300.2425095033273	3.0005264763061827	3.6492330989940513	0.7913315838824472	1024.3816838598298	26.492328086139167	52.49530480168711	4.522414311477505	1.550034509449565	0.00002411967894518347	-0.00011285829618625164	-0.000013232491258062566	2.8348588042956684	0.00017800602644883314	-0.0001553087777096367	0.00003058081627293281	4.7780845581979285	0.003834638812378841	0.00008621788858642492	0.001079131036308541	7.442925786916938	0.01251061696842873	-0.01876485242691611	-0.0022319246755442613	11.86768392586788	0.07643905838149538	0.19386072477895913	-0.022023897720335864	21.95603142959189	0.5364416535217735	1.117192225002724	0.021591561083862624	1.5513684886032142	0.006467554655242352
2.3092226408599448	0.0003385573842268366	0.0005811364097164	0.00014776026236427525	8.518420047541891	0.004675616632765551	0.004843180681499481	0.0011668260718829414	29.29474640005955	0.03562047594386165	0.03877316730057324	0.010351009421360566	92.31966771397349	0.3051809549277801	0.2724164770575994	0.06655728607424077	239.11442919201218	2.354922575438318	1.596159219206636	0.37930857137524904	664.5804437889202	15.250229034451511	8.019971843598388	2.4509061027452526	1.4589688003222774	-0.000047323778586331624	0.00009910896297498968	-0.000037988797966943535	2.696700998864563	0.00014346025700958293	-0.0004955146724976876	-0.00009494293986122785	4.663185374995141	0.0026699327734477363	0.0013038323170105836	-0.0002881389926439552	7.438442258724617	0.025957483788892465	0.0004360574724075069	-0.0020492830693186457	9.91798760977166	0.11867057654835494	0.013740819433474591	0.02310719436968017	14.696120853926704	0.438709542350104	-0.021128804588430247	-0.04033615535108596	1.4601432300808694	0.004969431095304607
1.5732379021049632	0.0004352749342170888	0.0006195031319935103	0.00016510752342119913	5.701477834312512	0.004542320423793275	0.005817629116796414	0.0013703264866379496	19.17791392110315	0.029759698710878267	0.05444346458638516	0.011149238792230577	58.00321234793931	0.2735445466928582	0.2269859860704323	0.062055468971770375	148.98061429755376	2.4421308450886037	1.6319841412063911	0.3496300908153324	406.104158426952	15.10376301277356	5.1572771116585825	1.8984575325858635	1.1876988160291828	-0.000044418060385813876	-0.00017623568629451255	-0.00007066429440913441	2.157498821395022	-0.0010083432655858858	-9.597210465474409e-6	0.00018335166398226874	3.652088407293969	0.0015415144014915378	-0.0018292630772319962	-0.0002688528397841956	5.592821930941524	0.007462476128955748	0.0055236841898788575	-0.013300865575059157	7.416928611838306	0.12446478410722052	-0.049078395830385424	-0.01233278796719616	10.894051892005665	0.38045554741288046	-0.16720446498798827	-0.04483271532250155	1.1890726512572256	0.006425035023827232
1.8381820214181517	0.00038708727709897846	0.0007050701543422016	0.0001925354921427513	6.636349793394993	0.004295758708981294	0.006452465351298757	0.0013942012381030007	22.43781644973481	0.030687848207563793	0.05260012479170244	0.012903089400555696	69.74584540171321	0.19612117690293815	0.31336461113649894	0.10144614233885843	173.36062504851458	2.292589343146243	2.076886688511119	0.37513765678017225	512.4045565965816	9.587597052242849	7.9174977859739855	1.1825950554604105	1.2783079407474587	-3.0410745619878826e-6	0.00004324027867991262	8.843024248995852e-6	2.313520141643318	0.00006283340803736259	-0.0010139153561587995	-0.0004106145703024306	3.939649264105181	0.0012988128690199691	-0.0067065030896083936	0.0007771408579491177	6.22801921760203	0.01543370083667507	0.017304933056997682	0.002529770108682633	8.140515886730142	0.1502905434894265	-0.08642544887487048	0.010898795339429711	12.829579241038017	0.28969740755291434	0.26241944031994685	0.06114763802158706	1.2796890621788648	0.006156680923237242
2.5416928139607	0.0005306040243710942	0.0007976177216110866	0.0002394140687496471	9.140284877746723	0.005821681807605359	0.006607799837476064	0.0018432522924438466	30.096960046849176	0.057377804502330834	0.06459506216916049	0.016732738136704933	91.50620703156801	0.434783008719372	0.4042614926912735	0.12444939333403304	245.7442731941574	3.210147933357178	2.0759070355554603	0.602830190592759	618.3697487850214	23.201418220726783	9.854009189189089	3.0299537805572654	1.5052122422490528	0.000011021913564015732	-0.00015958454586917237	-0.000030624458248576634	2.7124811580440435	-0.0003745667444585919	-0.00042505205077851755	-0.0004937122706544846	4.494452727534605	0.0016038515920973313	0.0010006711253299975	0.0012592041531738123	6.923591180849145	0.03682441096130481	-0.007391646755424901	0.0074401882763377725	9.526119177168964	0.16647899957360385	0.03440560204541601	-0.010207152044331345	12.733019293487352	0.6013675938205634	0.05532222010712402	-0.047851166744720466	1.5068124650652754	0.006668289623172667
2.384903863814009	0.00039221987199171247	0.0006973731208243789	0.00016522725037941324	8.679555977338673	0.004929712739203986	0.006458529294678307	0.0014626190585275852	29.70154042552694	0.03825701143034557	0.05875322550645536	0.012071723284094582	93.22462268429936	0.3042162395980404	0.3296341676126583	0.08474894251838795	235.01305599519932	2.1319401397254363	1.2202325306031923	0.3269311908959628	657.1258186407126	16.799959566431742	8.477386773643264	2.9114345573456433	1.4623565804875827	-0.00015502336060335784	0.00016641167946388944	0.000025075922048274676	2.668217534456378	0.00016242628660914678	0.0006004536525145477	-0.00019639936959045312	4.59911251945791	0.002640667147988499	-0.0001651244519936924	0.0019425046367271498	7.333917475521954	0.0347224225015666	-0.013416000148974231	0.0030233053367076496	9.547450980820521	0.15119701630355545	0.043680875004667954	0.007965941562781395	14.216228873344464	0.4004823341755179	-0.25561838151747224	-0.033919719864289495	1.4637382974698834	0.006610191698684954
1.0502623934311157	0.0013048765066928255	0.002369501905368658	0.000493891816916594	3.7209295583291953	0.024206541139569333	0.017137330286226764	0.003611115732233322	12.601651213701274	0.06687756537680963	0.17075428142528362	0.026435172547560216	42.291110323334856	0.30793521321077044	0.6583556773778607	0.15390949998423212	123.76423747605416	1.4315565491050808	3.3113409713396664	0.6221361410054597	408.7590910480109	5.743053942896175	19.625819230419317	4.567145440480348	0.9403747512634151	-0.0005650714065659583	-0.0011309164688823078	-0.00007325855828949311	1.6905514424666996	-0.003830595742129342	-0.0035090912145075135	-0.00004000832015876541	2.941653070011837	0.010024305820514208	0.002642170785523761	0.0016377719411943264	5.098087270048183	-0.04096850802925916	-0.017273371897572727	0.007350261672503084	7.9762275793439965	0.029669643245000172	0.01369170534596594	-0.024262722573825127	14.6102211971912	-0.06218527174084272	0.7546839297154107	-0.1390307170075566	0.9430646936780593	0.013532516651572585
1.869704861310401	0.00048531467448828395	0.0009519541512933556	0.000262468784318849	6.6164810096971385	0.005227733226346635	0.007904286006072613	0.0020332484983242934	21.281133658620888	0.03709574544096811	0.0570304484845586	0.014715629470630069	61.058112095035035	0.19230991114782622	0.3313290476383491	0.08386001158892674	139.37580886996912	1.047511779795464	1.4028681512412469	0.43361981209508527	429.3688527431058	13.37544695987482	11.504230588056261	2.8174215363830943	1.2757652571539821	0.00001265129435923459	0.00030934322318941466	0.00008119866617263247	2.2639505740825454	0.000020262088179320545	0.0004867473519798614	0.00008485545986613743	3.6664502247637176	0.003051150605847601	0.0020041880327161562	0.00040940099593530306	5.333538933682718	0.0020048190447285487	-0.00689601873856171	-0.000392774684038698	6.352093507320598	0.02296610871865239	0.00793580431070646	-0.0036881908713593194	10.466344927436701	0.4260573416073307	0.08065674846988868	0.011510540106636739	1.277719833048266	0.007079848845263503
0.958735326004816	0.0007556211523627197	0.0023684121747187727	0.0003654226668627934	3.199907479375845	0.035067086642120444	0.017814725248313783	0.0022228630392982394	9.956270836886157	0.04404456328713576	0.09842905260465669	0.01560071959860143	29.71129942235783	0.2095242985236462	0.5071916032331553	0.0893905411733016	93.11882091768815	0.7443373119979925	2.4286492003644913	0.3490476410431212	233.54801331756556	1.8980515426453421	21.53174433080456	1.7454699867038226	0.8889040399933215	0.00035424622571046877	-0.0010675042798940191	0.000013178042015553105	1.516622540085454	-0.003130943474287928	0.004769258533471907	-0.00007623583653173655	2.4307582605190166	0.019214004244029078	0.015150073318138727	-0.0012465713186413136	3.783437048810385	-0.0632319101832274	-0.09922152744067339	-0.004625163115266987	6.22766361574077	-0.03773460619826718	-0.07609868236177547	0.001101604611813264	9.123938103199034	-0.20375882514638746	-0.07237935141610007	0.07258682422844115	0.8918942107341483	0.00924085304874418
1.6406576407596882	0.0005174532628718434	0.0009302963956868333	0.00022267261409912166	5.871705110925976	0.005133020969936073	0.008816722030460362	0.0018772597387046184	19.67842943189478	0.043362993932762245	0.06870987262869732	0.016236611551665028	60.15675747326004	0.2599041901422828	0.3666047576313051	0.08752006075101311	148.88742655689086	1.6167234974463658	1.7809555149217215	0.47537307284330316	426.7718095155283	15.608896406441431	7.10834041134035	3.3395740091305095	1.2026626060232386	-0.000023220185963501554	-0.00001896432154148045	-0.00007132534810363856	2.1594455294425527	-0.00011991256420344515	-0.00024883528773937013	0.00017299088256987467	3.6514828710681764	0.0010159659473111759	0.00009344032118844092	0.0005737856331794647	5.682729954373457	0.025202172996611115	0.026541739188492387	-0.01313641999876778	7.268669313405607	0.05188156259689238	-0.0010598581509815269	0.016202857849345047	11.196402927433551	0.3238541291660773	0.4042418772362431	-0.041200592639274294	1.2043857777631963	0.007880864057266708
2.4812628714522447	0.0006105771381716909	0.0008705633730771724	0.0002509553860522408	8.863418351339929	0.006415797405078135	0.007381699486417942	0.0019862284664325987	29.12623262682135	0.04826175997765354	0.06795159862833333	0.014425239146656556	87.88333049975381	0.3546122709412318	0.33774915839164055	0.11392242204070684	218.5008490439515	2.73680963412512	1.8715215821907403	0.46112259331138905	649.3601591305137	15.816026694063558	7.866572084982998	3.392001847749667	1.4924913480585953	0.00006043883980127627	0.00006523396802515198	0.000103595662600494	2.6715193294818977	0.00008096425692255289	-0.0012959780083972759	-0.00022062163748017049	4.416202547756333	0.0004991585232699069	0.0009305812723591021	-0.0003455334273599243	6.749062015129612	0.022701353765180187	0.014380284676608875	-0.007079430868383157	8.681979935048657	0.12257946913051955	-0.03018083561767853	0.025049446198473258	13.790084646273971	0.5915187835697902	0.30026022915851486	0.039757461461891144	1.494210293835764	0.0068753886461238875
1.9470930645353728	0.0007747652514017351	0.0011011063871835527	0.0002527015331301172	6.847376753015591	0.008386763032742127	0.008715959519427895	0.002131200125344907	22.284325567268116	0.04566839884078483	0.06456482517042067	0.018177885610544033	65.0230295852464	0.1976000337216399	0.37168189596968043	0.07443286455668346	157.78622992872963	0.7531413563736313	2.0305022554617307	0.5225809947279827	308.4271858450339	5.141696173018108	10.475060897832597	1.6028453421570128	1.3026386526543	-0.00002533434235214737	0.00006250776196198441	-0.00002371284664506694	2.2982562762762524	0.0000869687738845539	0.0005518498694092685	0.0002852402972998092	3.7665545363312214	0.00029938619244295687	0.00019613982171830325	-0.00003633881170103051	5.563920993340645	0.019438217340598925	0.03709984678945123	0.005507839948657303	6.997881610141401	-0.013933038751622202	-0.03538028071556049	-0.024439292895863354	7.596655049197433	0.37697487477006486	-0.27435615385157647	-0.010386207762650453	1.304760009738561	0.008309553279733392
1.8684093073605936	0.0010330090525650642	0.0009742687204084119	0.0003599898140944924	6.630428348040058	0.011030575769481583	0.00889352107967397	0.002658615709157761	21.746574273606363	0.08859272899947009	0.0679003427989003	0.02331873121845754	66.50950133609922	0.5447981952537558	0.4815475746331609	0.15654745656706356	173.4785079258401	3.296472725942078	1.5904101804106245	0.7256763165592904	475.0754352040326	13.51095523303575	9.11030757319478	4.306972196164245	1.2675787722953098	0.00005172600806226662	-0.00011216441636516303	-0.00009315087560368319	2.258633544722645	-0.00008295581828120918	0.000530744524179946	-0.0005384254063684556	3.741068996351522	-0.0015697555779982985	0.0018184988717277006	-0.002575758980699133	5.830112496292972	0.012576848642859177	0.010826626140696845	-0.0051250584549233985	7.888147695376653	0.1752289572422851	0.0011043148956397279	-0.020104009299617875	11.874766827768589	0.36612844762057917	0.1726391801620373	-0.006706632615723855	1.2699903043186496	0.01155174150114673
1.6187378819783473	0.0005853807897971608	0.0006942019449899364	0.00020951886469853064	5.811724090571756	0.007110208211139137	0.0077040748310281	0.0020151898668469797	19.436507976333463	0.04450434821353712	0.0496245508351778	0.01791436075542848	58.500866620136634	0.27642624469094046	0.302239241288154	0.08916182712583903	150.24465360792033	1.3650154628465188	1.2483813088646774	0.2639039606951302	383.2139793718648	14.2557574053595	6.931481308075123	2.193453827022991	1.1775145742517614	-0.0001878778252018875	0.00006476892737242258	-0.000044163270595391096	2.121636857271764	-0.0000622903303439523	-0.0004050341586663534	0.00011868393744305518	3.5775716006984775	-0.0023867794232397647	-0.0021268662173223366	-0.0016954401121424875	5.47745076135536	0.026448256648739593	0.01663261515973992	-0.010952868427755351	7.31868706161598	0.021773224457672255	-0.01722089177961999	-0.00319669979777385	10.674533162578907	0.529411052549395	-0.17939864675453548	0.013997910456837643	1.179051835509753	0.011699791000219891
2.061416823994963	0.0004849417154464914	0.0005639499628970827	0.00017222836549877991	7.515607238048933	0.004630590547910803	0.0045303054817776335	0.0013296990935060989	25.62180071158315	0.04808808192490852	0.044556439120512846	0.011685547297998646	80.03847075869486	0.2906865366224799	0.26794433822341673	0.08841568595991568	204.06135831914943	2.2647402461407284	1.3263227165267488	0.3479890308937702	598.680439944062	18.102830905820333	4.679782186292718	2.4133988535371196	1.367408260556534	-0.00004154677758641862	-0.00010891862582742186	0.00006442399039797583	2.4972587661143564	0.0001927015626470041	-0.00007722544968580112	-0.00032898643178450943	4.2816415917057515	-0.0008718265505984407	0.0013844447908386457	0.0006867778686322218	6.769731609672886	0.018805935224033964	0.03324299942990528	0.0027260445563083774	8.898292177288315	0.07701800494331984	-0.029217338455031237	0.0023059444943455422	13.792409611251331	0.2775514383488736	0.09357249920523233	-0.06595088735884323	1.3687326373466389	0.006636580138560661
1.0152340814660339	0.00034984653579985144	0.00044368707261752794	0.00011809340493799337	3.6718912033858597	0.0037350792076805903	0.0035253401407850924	0.001021862994793909	12.588657049929736	0.02549910639302481	0.024700864793084813	0.007325991522924058	39.3884732454422	0.17493718208027084	0.19395960780624105	0.06855932503274019	98.0957565748007	1.226639489081144	1.2283137212398192	0.20016200916697638	275.1023170011252	8.079067539684582	4.851918022273033	1.4220148688834175	0.9540575248726675	-0.000020939793837035438	-0.00014504383379393055	-0.00003625774200503625	1.7301073667075044	0.00003712935959915383	-0.0001235500052224407	0.0003411866723608539	2.9844538064069965	0.0013198175073680023	-0.002222321982754811	-0.0002843120246865873	4.7399955589728595	0.014167877331542598	0.012744190167854077	0.0013087971432394242	6.131644294788988	0.08390954259480171	-0.0022138131367205045	0.006161932466701213	9.288881358835903	0.32107484131534364	0.14373468374997614	0.03762277740795843	0.9552866578891787	0.008178529608315036
1.3783295523077947	0.00030660867760905094	0.0005046730147423039	0.0001339951440028202	5.025724549878398	0.003761773884881235	0.00403314678126031	0.001171698213866026	16.92548148519517	0.017889435646060638	0.03014818073021463	0.008719210205678762	52.34040385960256	0.11399984515998253	0.19928293865218877	0.05370406391433268	132.1220041944271	0.6774653025146026	1.028998440204981	0.27505539685171876	352.6291704417504	6.403756797772201	7.261132866998015	1.783409163531001	1.1194961396088894	0.0000476901683210842	-0.00006085090041500073	0.00001922717202056885	2.045576962161343	-0.000053605028684471796	-0.0002862221234442915	0.00011141096992564547	3.4601018951081386	0.0014695315535282819	-0.0019188625582650136	0.00031701131293717847	5.3984356203500115	0.012480630388810645	-0.009121524941890207	-0.004668618009587321	6.974896199463908	0.06272243187861395	0.03904815686997581	-0.0032830049692228044	9.98526968365143	0.2282329780004909	-0.13602827843778084	-0.059721170986447566	1.1206411800344125	0.005739615358369314
1.6448923094320145	0.0005014855805281099	0.0007023290677366793	0.0001753472988757363	5.92500946439814	0.005245733646388325	0.005926714107134103	0.0015217565407831713	19.851013752741814	0.03701357745289823	0.041483619332384564	0.013105682828876692	59.150789783111954	0.28557913964834375	0.27898521734033016	0.060780053391142196	148.11660586162373	1.9401673086735507	2.115547988565626	0.3923381713382751	357.6366999601711	7.946307393033301	6.421899364300359	2.110274253580022	1.2050446553311502	0.000042265374410840875	0.00002732985139980444	7.211406327064839e-6	2.1764791365878886	-0.00008590903274143087	0.0004192778519419588	-0.00017867767291340807	3.6713188403341475	0.00250287477451424	-0.00411252755902723	-0.0006755774588789461	5.554123183331029	0.01894048399977457	-0.006826725812495392	-0.001617780123093706	7.205380107465073	0.06213992088455989	0.05261986885607896	-0.011136266717295333	9.3119057073342	0.13015591782418942	0.05106589480452116	-0.10180059233822387	1.2065912577410374	0.0097915053812629
1.267221887255192	0.0002645821262550405	0.00045359283079931704	0.00011945043902486349	4.661737924110851	0.002916628235262602	0.004186734517659633	0.0010876350771736251	15.99150452954607	0.019774515073860105	0.022521697477947283	0.007894889258810588	49.43017738881824	0.11109441399819699	0.271919825557661	0.057617569631910816	130.36267138499784	1.7757093346141948	1.2787888033277228	0.28390501573035515	359.5060018450516	11.579231555816582	7.101512304196198	1.178866965650744	1.0756435874910117	-0.00003127615365324543	0.000018695711478726875	0.000013634893381410747	1.9829837182735097	-1.839029673875273e-7	0.0007167882493918117	-0.00013387771982416617	3.4178895856213796	0.0026492521480199834	-0.0017986029509725577	0.00037091777630916627	5.361396483223467	0.00036582154231337705	-0.001922901525618057	0.0002461471318241056	7.347019869070488	0.1455643068633741	-0.007543927523678274	0.01205367235847536	10.921653823169047	0.4446702762556255	0.01122874391171045	-0.020420373517702563	1.0766543062761778	0.007211911717268388
2.4221303524278732	0.0004713206839849795	0.0005657606781611525	0.00017752778670081557	8.934330161676606	0.009807797435456695	0.0049930785216800964	0.001242861388028426	31.104976159457795	0.05084998917342108	0.039787415948439354	0.010166946135914316	99.11926973892201	0.2854559311708967	0.30037970382592477	0.07118420254885138	254.74806257992594	1.5302658622020497	1.310905446974493	0.3500876274532699	736.1370723328218	6.512468773009358	13.59584960034005	3.665787932444327	1.4886943315723202	-0.00003433130936845575	-0.000050947312225216444	0.00005548546732462383	2.7551030778349843	0.0005034727795860255	-0.0001990627812382853	0.0005208056705301128	4.829690753513664	0.008284497217813042	0.0025699046093951923	-0.0007461137905774236	7.786060094264613	0.00007266537335398652	-0.021947776405929775	0.00024273918252093758	10.264181426640967	0.07672460763187806	0.02511049313001602	-0.0268184691636424	15.699629243328536	0.3820858937968548	0.38085122210087713	-0.011133914612492659	1.4899606079743342	0.005678408756584256
2.509023330340718	0.0005610488502685466	0.0006705136762884684	0.00016064228376828698	9.283437928404167	0.009240975180470122	0.006297111795715527	0.0015674787237589987	32.10898408533761	0.05824779367351797	0.05118532130891756	0.012968327679631894	99.46679073520748	0.44756704115362594	0.333860795441829	0.10169505021069748	293.0398085412919	3.5612017940698397	3.4805222749178517	0.42324841019218185	1113.416141804212	27.797902840373702	80.82906719173347	7.7302322445218605	1.5220930852535122	-0.000028046729596743293	-5.965172854537884e-6	7.482065444661556e-6	2.824615970470368	0.000012008556460897354	0.0005254053695383575	-0.00005810215354443759	4.920884709901677	0.005823869791159775	-0.000036291592781924785	-0.0007220516315053223	7.762962050618689	0.028694443332555476	0.01838050954100706	-0.01244386790716848	11.90594868586392	0.14306473311227336	0.1525360826290162	0.02683634114802099	24.913251915426034	0.902895849653636	1.914444293187022	0.16966741082801787	1.5232727794808145	0.008411678375421524
1.4794013242038246	0.0003557201102562698	0.0004006372058484659	0.00015747103120871862	5.371515815333142	0.004405413496429895	0.0034237865807106665	0.0011702957154011188	18.10946039254379	0.03231039339751928	0.024612935696491263	0.009272531581585811	54.98455422496062	0.20046023498880128	0.17615137517101814	0.06452408886083498	143.23640715862697	1.8588553521548303	1.1841891650326908	0.4953123195897022	350.2176579593884	11.87252071631668	5.6343889987101505	3.6094944033598955	1.1563062854711568	-0.00016076567048236868	0.00006670327877663889	-0.00001683927121904207	2.103932082982875	-0.00019830250537416661	-0.00012368405339329333	0.00014660660972135492	3.565613294487434	0.0002958127552942906	0.0002998276561231806	0.0016706573145438368	5.476769762914731	0.006441366088251233	-0.004370496317867214	-0.005795660242849988	7.355893302205767	0.1034476030449915	0.0711158089956868	0.010027930042011067	9.806392682108772	0.3827309658610462	0.16429550039603752	0.07934436208598543	1.1575539913959108	0.00744291934490294
2.2238261413481757	0.0009269333583785337	0.0008639316975314805	0.00031803066275497467	8.081095361528366	0.009343420511650918	0.0070476504151417065	0.002316821383533044	26.826916790788527	0.0727894313057676	0.06483858714537517	0.02024996622529157	81.8337571645863	0.5336430265283396	0.517356670184275	0.18302980227598323	235.9681352823189	4.315035354973294	2.0292688637684133	0.9968062175561619	817.7367978699718	30.387639499213808	32.82787917361969	3.3919645961966225	1.406328565962802	0.00004094255272514064	-0.00005155973096089534	0.00005939620303929781	2.562266290613871	0.0004122667047649934	0.000016646386363876513	0.00012359263696235374	4.285094495785111	0.0014952067848580132	0.0016994140607932717	0.0010712168299606994	6.689480757861654	0.008187915348067518	0.01223697225785686	0.0007909971881720955	10.169649070303555	0.3245443466860734	0.039897589709485426	0.041443979479817775	19.243567147389058	0.9678048578718507	0.8314784810003918	-0.0664317531291574	1.4083127914796296	0.009275991308699178
1.6126720863954997	0.0003195623857868738	0.00044849149687754115	0.00011948558973681074	5.898879635928811	0.005498584898773401	0.004117586858138356	0.001098538117457528	20.230551405672234	0.040257817733618424	0.03358058247295888	0.00888166159833964	62.95961028104598	0.22331363042790792	0.1878881520517761	0.0551230488739308	168.73513276453235	1.550140776438068	1.1704407889745112	0.2867030350084581	464.4531153159012	12.67839635849607	5.452564775333181	2.109577757516252	1.2126444790821853	4.660440239794533e-6	0.00005283441189584677	-0.000041338118342459946	2.225024879194304	-0.00007455557063266915	0.00031177899343902193	-0.0000995657347431526	3.845725605130284	0.003457282222585404	-0.0011200555895367174	-0.0004252124429318408	6.068449011280357	0.018716399758952423	0.01222342558064026	0.0020214578433304675	8.352550421092657	0.12234095974889952	0.014616763991363151	0.003928767425650801	12.249928739201037	0.5243833068976785	0.14929586752812146	0.06508662140885499	1.2136782258868763	0.007510736936207399
1.1930884163372761	0.0003746939368818238	0.00048728614510923325	0.00012243948927937216	4.369295344428467	0.004546009418183297	0.004534908193815035	0.0011701795955410418	14.933714151525896	0.02907940371466493	0.02943866160704506	0.008033278308929312	47.064443388212744	0.2260159500884071	0.20287447893423802	0.0614076705194176	120.05423167102887	2.097078348440066	1.0536534681256489	0.23637518827630669	333.8248286438219	6.33362844440608	3.9803508019457228	0.9481061308743292	1.039405651307532	0.00008187801798197544	0.00008205331438605112	0.00004501621897351361	1.9087579399145573	-0.00021357595362420364	-0.0006048163111174817	-0.00014102939534556613	3.28398123620104	0.0014104914011372658	0.00037261577258688994	-0.0008807224772878678	5.254019467882552	0.02623148543270044	0.0055696428339382514	0.0057158701598742975	6.977953025318546	0.16030271666451437	0.004619278632093664	0.005953838999926764	10.403219305801157	0.28852521054293867	-0.1365137088689072	-0.01933017992665217	1.0405648207208313	0.008089012721324673
1.75328858047062	0.00044927193713076204	0.0005897904447232835	0.00018535219419148156	6.384024492102878	0.0047060482491472835	0.005214153104510851	0.0015001749425363066	21.552888842924038	0.03521877026924319	0.04223204075260848	0.01132123095347948	64.59134175530383	0.17323163105160092	0.23611115140563776	0.07114641610418698	154.47526642325641	1.0625199679606028	0.9764319660829299	0.34973282998794897	462.9553018819766	10.352634515424125	5.065400385054772	3.4607819992555067	1.2480216175934549	-0.000029805551688804154	0.0001317952002208761	0.00001622774274617887	2.277826293077062	0.00038451288476385636	-0.00043542961495360885	0.00008771235158232909	3.868641619692952	0.001256774195246162	0.0012330169290926912	0.0017579467566773916	5.870369250878682	0.004523674152204091	0.004527998876595757	-0.004099845760658303	7.275797198481873	0.08170464692765275	-0.0019478629617150508	-0.007292910751871553	11.78775544742881	0.4015019446565329	0.17106775618901202	0.05180419576715648	1.249438882621836	0.006438802161526398
1.888013715389616	0.0007408599936779782	0.0009351382903595161	0.0003173787354544195	6.709908028915967	0.0069840196747546985	0.007499062141228269	0.0023119389636881336	21.742012540629915	0.04752767033228463	0.05826621389677504	0.018847565373882137	59.563160092361734	0.3309358267126449	0.38016233340123984	0.11252157947703258	150.18169296860682	1.3004797271871997	2.5387949002757457	0.5193214644426952	491.690871104864	10.726148107815847	19.733867974629202	5.9239002921726716	1.288774382391704	0.00008982750869070662	-0.00019217717989466871	-0.000014527589764641986	2.2964324830848	-0.00012401770307258545	0.0006654448975064142	-0.00003703832690684556	3.7456742547247712	-0.00006705161259148618	0.0010570136673090224	0.00021104654859573736	5.217316642416728	0.011999707049224201	-0.01578603489536225	0.007802504437019147	6.907460279768303	0.06869895903603636	0.07104769779049057	0.0008723659974683755	12.28428513039164	0.31965970137686683	0.4940965349950349	-0.0775330451234859	1.2908853704162069	0.008225043559012471
1.947771952906558	0.0005989666489626992	0.000889339451302502	0.0003254748473940344	7.004016060288356	0.004886257410478636	0.006356219109322002	0.00170339835784756	23.595146708254507	0.03835132163743409	0.05945981355775745	0.012166950063731804	73.08281163493457	0.33480106615234445	0.3645534353031163	0.08723933238568714	175.6183301508564	2.0873071989572813	2.296764672891762	0.4840847987276391	449.4928118716378	10.423838037194422	12.639301086332564	2.8784024617057047	1.3190860509909765	0.0001803533120659107	-0.00007772168002763767	0.00003797148505741677	2.3773103183364146	-0.00014418396273771755	-0.00012665856281331462	0.00020558658914021676	4.029519951138927	0.002523433397867646	-0.0005005394346527532	0.0017759437011808685	6.324827026876465	0.012647588485163709	-0.016134286947091323	-0.008732867803418368	7.827958299566247	0.09408382617920417	0.007492912734819885	-0.012689225947486645	11.034156307997058	0.3821176894608735	0.07460530052357964	-0.09758046891540975	1.3206813112936393	0.006604922054625505
1.664894010851268	0.0008415907332248981	0.0006034674364908001	0.0002213296335834632	6.094804995172478	0.007720088874999206	0.0070070120581886275	0.0015206082529187364	21.07725138039723	0.054635826862939406	0.05310549740707951	0.01231455230759594	69.15683708785593	0.38853389810792227	0.41755177179892305	0.0855070650039285	207.3199211290931	4.084472704543038	2.7383747807199814	0.6033461151743739	754.6581671157866	31.892141473098885	16.42966166609894	5.533865155212823	1.2298626737699543	0.00007424145245908948	0.00003238111143618524	0.000011064160086684158	2.2592587626484186	-0.0003426797322491026	0.00030991689370302964	-0.000040696764748897026	3.9440970783116724	0.0013229689510847094	0.0016172865630320543	0.00040258027983094047	6.617748668398819	0.028325383990397985	0.02265055936839725	-0.010251312126603436	10.451869072948073	0.25475083411357297	0.07852727421672581	-0.0011417167249888932	20.535161219987362	1.1751570963038944	0.7078105495376417	0.1912097711135298	1.2313912994665792	0.008770337996929055
1.3354748865564288	0.0008942255790045491	0.0009081613429518208	0.00031767069237800436	4.66072517894077	0.007551321628235042	0.007266552281573494	0.0021464041529119645	15.342506626082441	0.052526272232507394	0.0597385197189046	0.016729580806814453	45.55041030357997	0.3803457706251611	0.3571942034982552	0.1304918676253553	104.27808348405111	1.734509304629004	1.5568055921139274	0.4055168913967488	296.4884899547375	4.637332198234655	5.787496287251045	2.664433136544275	1.0664324920126884	0.0000914926030541535	0.00007598998266868719	-0.00008221317814966755	1.8677471841761653	0.000540627875040626	-9.781539439243602e-7	-0.0002804043697282013	3.1032095629290355	0.003080460320928394	0.0017889962509370484	0.0009733714236960598	4.713034588834027	-0.0002333345143482397	0.009923914000847422	0.003976017449881286	5.694963418031387	0.012701116785657851	-0.05153706559878425	-0.013234571595530445	8.939727599589812	0.18769389822467325	0.08515305091017708	-0.06118799850243561	1.068810830248294	0.009190591595058705
1.5173181178891975	0.0007950080431485035	0.0010509803724254498	0.00032378946215638955	5.2620714501670145	0.006399781074503085	0.008050807505169327	0.0019037828975408974	17.012078226436326	0.044850114268929694	0.06640920707402534	0.013862751885407122	49.885845344945174	0.2669177488199414	0.5503307112119783	0.12672760387113932	115.05201364391804	1.86315424185477	1.6881412360237051	0.6155929206705352	246.71342320326107	8.222967698407988	7.847272447024321	1.2591081120284018	1.12874931303514	-7.306711437476455e-7	-0.00012233510463178127	-0.00005934081769915206	1.9639668226540596	0.00043168977079704714	-0.00024067311389090957	-0.00024025051798859216	3.2018359248211326	-0.0009338788530953946	0.0037170261343311257	0.003247049315576101	4.804575446795989	0.01957878768119525	0.005272262102454921	-0.0022123349021733584	5.802077318164299	0.09746484474035343	-0.007945810585759886	-0.014783992349420157	6.896892636634791	0.16238668639356643	0.17872119260420888	0.0381488233796498	1.1311144172402117	0.008699556098318418
1.1373436550214582	0.002012181275260665	0.0032789259769390885	0.000672722891633654	3.762176319671779	0.03178999235846139	0.02374997732950351	0.0041918061307506735	11.86033328871386	0.08471750137031908	0.16093512211859323	0.02828977130765235	38.35019561651757	0.3668046594008988	0.6532416733371661	0.1819535246052046	113.82638855014214	2.0392995033560144	3.151297859664359	0.7352056522007143	390.5901341560881	9.063401117720044	21.16052094970526	2.8787736864449416	0.9533405133463232	-0.00120579735770739	0.0012549549946071238	-0.000044627023813275744	1.6091820996984307	-0.004670248798490843	-0.0044199275590416495	-0.00016857863030537588	2.6209507613242993	0.01188972211139229	-0.005125681987899166	-0.0006119435551357164	4.418239298978423	-0.060257220577613284	-0.06097871258456247	0.019122866190234473	7.103517011231044	-0.026674795321564256	-0.06384402779365281	0.026060603853986952	13.664572539297213	-0.2687525895826806	0.3893028948318287	0.05234493138226414	0.9590498243330414	0.016664244606407676
1.3251501140163868	0.0009828790637563996	0.0008836411722477389	0.0003406549549759215	4.687906718295974	0.00880210590978664	0.007780818132136092	0.002432066905565351	15.448082731663701	0.06834975143159011	0.07508771675043487	0.022030527829817414	48.320437482990634	0.4781542753287473	0.38589319201132216	0.13484324071397907	139.8881458420833	3.2582198312353556	2.0919857246252245	0.7943375664102245	500.2128254601014	23.0490197062164	18.23494699086224	3.150931187239265	1.0608429773457326	-0.00012300531089485959	-0.00004515620383367606	0.00001352447504228016	1.8852922096288645	-0.0006261728848582476	-0.0006684565881027617	0.00025738017200113125	3.1497791778550717	0.0009975845600975765	0.0074269295919086875	-0.00014589493833899224	5.070356377551086	0.011181274409321275	0.024100457250485405	-0.0027649884850607714	7.7710435405270335	0.0711410719799618	0.033415995098313896	0.0252532656363318	14.834392822089614	0.07123799568269726	0.49754240241753533	-0.10767021712512341	1.063276501668843	0.010039183475085455
1.4568824239345937	0.0006161803401119289	0.0008788550139521157	0.00028536541593528284	5.200472548973087	0.0069470864227796515	0.007537158394034096	0.0021673462140790567	17.01435636752611	0.04383076349839757	0.058261780498059114	0.016323203277556052	50.30796889877472	0.26823820831331613	0.4261716675819179	0.12293438649932927	127.66427525222797	1.056750395051494	1.5114307943839567	0.8360521799372059	338.16254350314574	12.329936997162433	6.18739240525348	2.838809027023654	1.1367447436213378	-0.000048069811562230426	0.00019990037105536588	-0.000018907174728654946	2.036087787039644	-0.0002486020503203872	0.0007905148258018759	-0.00014190491450808497	3.358225578030498	0.0037373987031398266	0.0006865300076925422	0.0019693866988926704	5.061847197770461	0.011777357740703827	0.022148129031486174	0.0178364929738594	6.643365888226051	0.06848065377131773	0.028662219100147733	-0.04875396028750889	9.688925746544632	0.43242918852643114	-0.12413885423957431	-0.04550091835767418	1.138464726906976	0.00906204816963123
1.7898478764382457	0.0007319026340558083	0.0009370224571364366	0.000330541283699693	6.400510447911721	0.0067459550909341835	0.007836737048983654	0.002536095147969447	21.43406275180947	0.0546896253958117	0.06614103365121848	0.023686543203147534	63.22213683973359	0.2732873790304139	0.3167449626350775	0.16878434189860114	158.1712074839197	1.0306186384684322	1.1224137208739058	0.704810545674764	436.1875418990004	8.47215687755002	12.48419216563594	2.183321846681893	1.2487073925232979	-0.00007227481006402863	0.00007506261721404804	-0.00011511616243849359	2.239107016026138	0.0005781801025698654	-0.00023119161026555375	-0.00016486274708063772	3.778132124858588	0.0009849722103158665	0.0033005441926071888	0.0004249081294614191	5.655913310556844	-0.020551721117001768	-0.025173216101145382	0.004170706037992571	7.341469888892778	0.023626853071176762	-0.08236185220223957	0.004510702041524321	11.378374651867928	0.3079207093905557	0.41793073283051435	-0.04358750613793469	1.250676311033593	0.008078092709466364
1.492050461958704	0.0007527858046131352	0.0007459512073413748	0.0003018243997293573	5.248662823825494	0.0068335608018074345	0.006004025615628403	0.0020920834904938007	16.95155166659378	0.05161663799279656	0.04993827143695714	0.01664029657399507	49.30117952309257	0.3689912290760335	0.37023077600933146	0.1170600850209873	132.10793243155007	2.4806850453978724	1.0201255644613214	0.37277612247781106	387.5527487499063	10.773860120067459	7.803291640277216	3.267554529608863	1.1293001310738244	0.00013986296799907565	0.00011390409724041056	-0.000044046713754418536	1.992756490314456	0.00002706976614090254	-0.00026605558499466367	-0.00011374957522843293	3.2452127904366654	-0.0005252876914516481	0.005219614815576894	0.000030376539850180308	4.81821986768636	0.015257819935047849	0.01393505158741797	0.012382672840027873	6.70026171019811	0.1547173365755988	-0.046445869810942196	-0.04541370645700907	10.614416594417296	0.47632917335696345	0.20038388491606723	0.013474556238844576	1.1312821350608817	0.009152238377215403
1.7301095718150517	0.0004281704195784651	0.0007926265526980977	0.00022112345612478724	6.1445107935185845	0.0045374442285607795	0.006349740635802758	0.0015321203544963965	19.46796406176936	0.02919281762970017	0.04331093647863424	0.012053961135605171	56.995403180280476	0.1434714984168058	0.29244262264409243	0.08307861428151216	138.40128698836946	1.358378885266319	1.537911147699838	0.39332149457458726	373.7444221868752	7.5647488849381	11.21129421377621	3.127594028004721	1.2457737594140674	0.00010334197222450636	0.0001265425720913463	-0.00016873084812525912	2.2176324774706098	0.00042260007388329296	0.0004148663627677011	-0.00021568592210612637	3.5339628661059144	0.0010097222603816	0.003506476334115379	-0.0004528313837641618	5.237899733412982	0.016466160928537626	0.0027431628182816264	-0.0029898215278357197	6.547827067191995	0.09044277977873903	-0.0430340494829901	-0.021782057152774887	9.961459856549258	0.2651985715157337	-0.15852411075693962	-0.05562981871696386	1.2472748238759157	0.006417729714184363
1.5913543280946127	0.00035862722552921215	0.0007337110644711119	0.00018548487437321936	5.747924011697042	0.005002757180020886	0.00616924239187363	0.0014892889165491043	19.34276774484416	0.04181581483294906	0.04586082111648029	0.011255992810836633	58.8090900098007	0.285409210589311	0.2822409273113882	0.06680440852373176	151.32437030887527	1.4947606588366036	1.1706192045146657	0.4368105977251091	394.4440109111646	6.971472992335228	6.942315703837324	1.853984537173977	1.1997871641529974	0.00003987963087543828	-0.000022158182304178437	0.00001371319072956456	2.173970059578099	0.0006089364032445843	-0.00003840604700770357	-0.00006861007620337642	3.6881705329849876	-0.00022082617773823041	0.005114373123112396	-0.0007596726849994623	5.700398964905184	0.022520369143231942	-0.016459361099324808	-0.0021969667717465376	7.549679812856069	0.10811749766138502	0.03773444361672705	0.006103440550065548	10.665283075137637	0.3844895552581557	-0.30818280953203436	0.004453065265241745	1.2011506440833302	0.006387729344163946
1.11974096547287	0.0004327269099830375	0.0006886677935074796	0.00017778507377815578	4.095605657969933	0.003938781933296007	0.0062542450076673245	0.0014843555294595404	14.027249846129232	0.032468804910288404	0.05466514194982652	0.012686611440357988	42.4661063265796	0.1931395180068166	0.23257315817551255	0.07881819090047625	108.51724466822516	1.0212917107653052	0.7867251491944781	0.3016419335910285	329.08320495096797	10.58127101611125	6.896058524800605	0.7017950077300005	1.0003701505875884	-0.000045415164117955396	0.00003242612691741237	0.000018973953814179243	1.835423021503851	-0.00010197644405362035	0.0003666904167418078	-0.00025288351529699233	3.1701530950031773	-0.0003597658972418447	-0.0005147844688159677	0.0012111457913615681	4.876095815989228	0.010719031201600992	0.010796076209832877	-0.003743967406073561	6.462267692172406	0.08775478631049476	-0.03968919550858064	0.00011459231345470864	10.4075675205507	0.5214834545323606	0.13899773231990636	-0.007293745763401523	1.0017767534987811	0.007893307630080294
1.6508474233745898	0.0003938056479460336	0.0006053562272482692	0.00012189676507935713	6.0549577821912335	0.003326088751532772	0.003959593268076709	0.000916711568055103	20.818682679049797	0.028516816680911314	0.03273787042475358	0.009512353070706359	65.44902533969456	0.20326508949931224	0.2628034789816233	0.08405404521026308	168.46213062438534	2.0299591086664814	1.7119662310810044	0.33625699764547795	495.82774900970975	15.961262152124684	8.953489420689007	1.9109012943711008	1.218995606382673	-0.000020647689727370115	-5.042724227932969e-6	-0.00001749915574052556	2.2400428865413415	0.0005637994483139611	-0.00025892269781412644	-0.00003296160186773677	3.872607583830936	0.0009856163869647976	0.0008408145520404038	-0.0005945950534034719	6.1737006135658845	0.02084048467424423	0.00022200292549353972	0.0009627066255444966	8.255204236253032	0.10360944135108092	-0.0018818634810051148	0.017650353693145427	12.984012223935835	0.4666432131157866	0.2662633989197996	0.10737575983180471	1.22011251637021	0.009636794535484732
1.6090833885753812	0.00033074282223919126	0.0006191607240247589	0.00016259409625125752	5.784689298853441	0.003395479078883093	0.004862304812137396	0.001148839393764672	19.149237543612877	0.027429205899507574	0.03438277465132974	0.008145152842427977	57.59221858399497	0.24675777607108546	0.22212661717370188	0.0545443291123282	149.06084242885507	2.1274971069971156	1.0338696882025908	0.3086682045195801	391.97956133341677	9.654359878360292	6.372772834280307	1.6369462249357891	1.2060469717809206	-0.00002441527597112553	0.00011759807018522568	0.000012236631293636923	2.1728670661729503	0.0001933543850458638	0.00007908039028320061	0.0001851113149250277	3.6191423600347705	-0.002124192405465258	0.0011968480842342282	0.0015225060951161694	5.520293827632237	0.024180255360405772	-0.007367362355150075	-0.01143891353302117	7.35276972618443	0.14415021013437787	-0.050977624696701036	0.010218069388671933	10.287911117829811	0.4609084847562073	-0.07107032318000442	-0.042196323336702896	1.2073458918092554	0.005381837859989855
1.3293254818933904	0.0007546412996949776	0.0010440415727657442	0.00031185361677228414	4.566136629065815	0.007364782810353502	0.009367009581126	0.002185688090790199	14.603163260659791	0.05683918196091378	0.06495621776792616	0.019657076651328542	43.716732824112135	0.27759933958221455	0.37505366912254057	0.12857864111919937	111.54702710742914	1.8369331841654992	1.9748431907563575	0.5507250551451022	288.8693910750903	3.8928857053002996	10.031456791485951	3.8303803483641716	1.0532594754613118	0.00003557489360302344	-0.000029251927108864687	-0.00006062154432224551	1.8178784791446665	-0.0003758590603353933	-0.001257458552605091	0.000023780151206058527	2.942960943519223	-0.0012260425186559894	0.005325460049579101	0.001053353512836299	4.511737807783009	0.01582498590049864	0.0175210614617965	-0.007739915459697675	6.0796899598853225	0.11168099323723595	0.03294725542335265	-0.02719476392182466	8.802108265692663	-0.10879242389916427	0.06873315836615511	-0.07247108640061171	1.055639984357536	0.010036039881427782
1.4181190702994977	0.0005238897001415504	0.0007343459281572145	0.00026072889128705507	5.008417875699485	0.0047492124354538146	0.0062550029478343145	0.0017542489503602147	16.018903742048135	0.032660951777135266	0.04705751278244551	0.013195081346861584	45.84339216094549	0.22768593903311943	0.3232895080777686	0.08470743432924305	133.23341864096838	1.9377950807260034	2.174850416672227	0.5008149588443218	426.41673570508044	14.180431050039678	29.411333316373018	3.6627852834471013	1.0971488976309827	-0.000052397679104263295	0.00001243783309912516	0.000054892920051014334	1.9426682092447034	0.0003680027356411216	0.0006110086264517378	2.6775765664435385e-6	3.127306044366578	-0.00026664045433834587	0.0000842330540852011	0.0017382532649384528	4.557616675978404	0.006694955851006067	-0.01258569270861078	-0.011040800574419784	6.918204359147126	0.07516846149475759	0.04790833040612573	-0.0171428850905	12.429225169468797	0.3727612478060688	0.7456585674203201	-0.09466463907289743	1.0990069330525596	0.007220544700431443
1.1446432141631553	0.00033019161939131425	0.0005059238297217931	0.0001297648700196488	4.11903788990681	0.003216934408935562	0.004564939382870933	0.0010456325162217066	13.547038219792261	0.018943841086547248	0.03199127780116379	0.00801410455792885	40.07802516056824	0.12485162252532966	0.16947237529172526	0.047356591759513	99.32949189992891	0.7804086964445555	1.0728168523144848	0.2201770599716792	300.0533082024067	7.8028273587177575	5.521932529628031	1.5688087184299364	1.0035592632709964	0.00006719100403735486	0.000029298151501446598	0.00005488347484095774	1.8103864102322773	-0.0003107939639755976	0.00015620402190228588	0.00018405780039681852	2.9942530306083155	0.0016247128512317144	-0.004367804722754935	0.0011474329236284223	4.485408372812245	0.012555965211797703	0.02360745956402418	0.007875397892400568	5.790825038736089	0.08978381144016821	0.05021109294696632	-0.017570231759328838	9.517054713898368	0.30632709625635474	0.08317234453120471	-0.024898400271021713	1.0047698751336724	0.007196282432776096
2.219796211900628	0.0007398486094272213	0.0007807968146926567	0.0002547208112489367	8.046635827669832	0.006845550127752237	0.0064765100742986545	0.0018324488856690379	27.861747091565746	0.06545119077198962	0.04886088900254166	0.016599160596184402	86.72416858921116	0.5375150381681028	0.3387200943631804	0.11784531123126524	232.52598940041855	3.471436738563466	2.116173360780594	0.658787776875646	744.6704696179286	16.29771940774916	14.531746614327956	2.78680198923904	1.408655536888142	0.00006161892083447092	-0.0002577219685508297	-0.00007570762151323809	2.559921240521446	0.00024326924452244508	0.0010627000470129445	0.00031175246353837743	4.465710559745434	-0.0007033434095025713	-0.001186624032594465	0.002046105407606803	7.072765010684373	0.03854498479007399	0.00746313305589805	0.0044733554290426756	9.92304028661577	0.15623749244357094	-0.04932210800058655	-0.010205084624942615	17.007220894012956	0.4701489520649685	0.5693313312639837	0.03310385894351414	1.410355980144733	0.007561235659765362
1.8288217320422246	0.0005281269216421996	0.0006819570134429818	0.00021579010991029115	6.607373881357914	0.005276080249766308	0.006212527617959913	0.0015336670672169241	22.25461524464002	0.045191170179714434	0.04272016119270093	0.012156742765787668	68.57494576723794	0.2859082957594817	0.359168265385888	0.07492562496799575	165.3064489397768	1.8428245676242798	1.0413570956051639	0.39595394244279813	459.6190887124637	7.7826146916234205	9.323267284916374	2.3155238218364107	1.2751824184352782	-0.000010092615809026262	0.00001997364800573249	3.915831181357736e-6	2.309748639871661	-0.00026783151804428716	0.00020832604295686828	0.00028517915067223347	3.916689296662961	0.0027405426852101372	0.0008561832262049782	0.0004580607233501568	6.124541140406036	0.020309890349301314	-0.0032006449211288957	-0.0026405265675400118	7.633784777474769	0.0807768693183567	0.032116712527449534	0.017517872309649723	11.419843875140554	0.4932128878323692	0.16676916934351535	0.04274391154161705	1.2767082386587714	0.007192815668559052
1.5630474339886626	0.0005088236209776149	0.0005532121019882917	0.00014545741305206845	5.5170159234832195	0.005613101612278676	0.004584764649198868	0.0013315009999390376	17.304674039510022	0.03374208919012523	0.03085147615720076	0.00956840488692423	49.362437096898795	0.16473824555058672	0.15037161093336782	0.052828283254035116	117.62019975462721	1.5202797835712036	1.0102264357584503	0.2958083533671909	333.84877806612076	7.161274510077276	8.700400245456068	2.015855262650377	1.1745808612858437	0.000014607442699890736	-0.00011815506660386394	-0.00003488737685815244	2.0792200757120667	-0.00033058999327855213	0.0004777871993557119	0.00027529043192578846	3.2843251302936833	0.0011625849247998725	-0.0009779556316112442	0.00032917626380121566	4.747539812797472	0.013861977921107353	-0.006234888724729597	0.004433100849648027	5.844344807270006	0.05133194983175571	0.06748538531287365	0.006455297206311439	8.837944000161444	0.18989283494454742	-0.0034454164401864066	-0.12710798064521836	1.1759484918787717	0.0108458665802131
1.2753773796596664	0.0004517427574560373	0.0005575366331916004	0.00015667734464955098	4.6786324540031785	0.003946242865275329	0.004812081236354095	0.0013013341044882474	16.149092704780326	0.03193192023207988	0.03913390041092071	0.010903337429661838	49.56252707940998	0.17679304508145874	0.24308283070214443	0.07595204164030432	133.52544572508424	1.772963076567413	1.3356940247751223	0.31948371117724106	449.0492512393851	12.931472873465168	23.66791987274822	1.3181692811822896	1.0765943237837352	0.00008220566932557255	0.000015950519841575095	9.929698088014648e-6	1.9793308143590271	0.0002283845418672351	0.00030471024356500375	-0.000019989889693314926	3.435947775855918	-0.0005153828089675347	0.000731878239093845	0.0012429062764514659	5.348200686135167	-0.011581265528117762	0.010076608631755567	-0.0038418004821962792	7.5443562052967605	0.06222779211831499	0.001943411212219114	-0.009084949594616172	13.948657860255642	0.5081136170331676	0.8427187804358534	0.04867052263899618	1.0777780633659464	0.007536354833826633
1.6538424482766867	0.0006236069841330498	0.0006638953773714722	0.00023205376856886078	5.916705869565412	0.0052823471800914	0.00557580827088124	0.0018193226126971796	19.66642305646369	0.041213394052793	0.04552072896541029	0.013925173470983907	59.805768141387816	0.2352455351291753	0.21308272191764	0.08813425878818783	145.73029648037343	1.0426462741136195	1.2265926407744256	0.4735348117813411	391.6264509903326	15.82800693035405	7.5152058273044	2.8649697138886703	1.205578888744212	-0.0000704665617400846	5.609608439059437e-7	0.00010270452028966865	2.1619156459781212	-1.1191594670306237e-6	0.000055709718644044756	0.00007288037025587356	3.6159009255386025	0.0011899730579119114	0.0011046207618642383	-0.0010173546442541434	5.5714541723222695	0.002046988552319121	-0.006576223343929651	0.004773016836809157	7.0331417990857314	0.07926763446775209	-0.019094186932764164	-0.01487127549392152	10.52726338658994	0.3861972818544357	0.29851159284724554	0.03097863901832432	1.2072795149924642	0.008079909534574192
1.3172897952732128	0.0014594917762566703	0.0025235758993010222	0.0004340055327562143	4.514816844745895	0.031233737563561192	0.02785526463684668	0.003054329026063947	15.158500997992583	0.05709856293288722	0.12319145615483226	0.017618856733113055	51.491854702859115	0.299452143692962	0.6295401641918537	0.10931030594183398	157.88675080134098	0.8600825862484139	3.5315427502426266	0.608872856836744	527.7685485478448	6.189262551486972	21.95551241022009	2.0370621030997507	1.0631466792928475	-0.0009759537797312035	-0.0019830828368231066	-0.000026101648567823853	1.847904033098781	-0.00456215244089189	0.0028036911887908966	-0.0004318484953554196	3.1497983778396206	0.012228870049561247	-0.006406178581914008	-0.00026569152490703014	5.461432632369213	-0.022840423577958242	-0.14365470679050119	-0.0014650211009356185	8.750455275677712	-0.001738933964560863	-0.03594102642947109	0.04102501337940867	15.939942899301936	0.12659409805953156	0.6737701986345193	-0.0033865108027575377	1.0658066219525877	0.013878268830668733
1.424123974646056	0.00036173135599309634	0.0004889842839529311	0.000151612319459879	5.194092170527258	0.0051467856653287965	0.004579062110456931	0.001201471986168584	17.509454513776717	0.029385360346075494	0.03545254535552775	0.009594593671788327	54.39963233994137	0.18801681975045995	0.19624641671445409	0.06485591530007681	137.16519322314358	0.7663753212814662	0.950694953417082	0.28120058848598617	370.63765858004643	9.883388976633325	5.078891639837128	1.004345658610721	1.1328583181174385	0.000031083969298108913	-3.0013946542528394e-6	-0.00006559793796263725	2.0721934479584845	-0.000019414046507861067	0.0005315213352892817	-0.0005256185058774858	3.517036669179728	-0.00030682961218940095	0.000446073988432115	-0.00019110891403710726	5.535203518850003	0.007389666405270396	0.006118567152489141	0.0004947572195095441	7.184719071758911	0.0035392351518081077	-0.050553155858437386	0.010416985514219424	10.537965396351595	0.35592309496147884	-0.07465413619474204	-0.052589916985694735	1.134049574554566	0.006388236756299895
1.501170000947736	0.0005012532649419753	0.0006316717360241355	0.00022065198182377895	5.298562102111782	0.006694435503831232	0.005425960507831345	0.0015534474717118882	17.469076935336936	0.04781920585055869	0.04795206712937255	0.01275954124649906	54.72273145592647	0.2946080836506386	0.3761839068007905	0.10029596952549827	146.9734680492227	2.0307336189092267	2.3140052395540223	0.5848030161460869	424.85932367157227	12.576090715259706	9.470439357772692	1.845183455046853	1.1397736962354141	-0.00005289221694239635	-0.00002958837857329069	0.000013012825059011391	2.0192492665786093	0.00008809394084124658	-0.0005581099302000107	0.000028564607203220392	3.3626306535730603	0.005980539051065947	0.0019673924767845993	0.0009992665397945972	5.3838355306357055	0.015256512031690116	-0.0130908510172958	0.0022083575628240658	7.5490613620119555	0.1847852088913305	0.009805994389845123	-0.02859153310698898	11.824714112229346	0.4871463678351107	-0.04004676230360387	0.018199550435905754	1.1414346886605669	0.007930112294281767
1.2328650814775837	0.00033522057162584475	0.0006421059370539383	0.00015296575361871121	4.463247185180087	0.003137515978103742	0.0051657676473286	0.0011581125464594447	15.276571773033037	0.02782577392742342	0.0388364958825561	0.00972468695446031	47.928038588922895	0.24399815093062693	0.27017928385484463	0.06210157213543674	122.82258663233547	1.4112738475266813	2.2509606896660754	0.3419446683724145	333.7087691110983	8.973768011972282	5.2321610377534284	1.2542334510994435	1.049029308197255	-0.00005643143747252057	0.00004766611273845469	-0.000023392578778118357	1.904009879261765	-0.00015881249588924575	0.00034095057760459704	-0.0002616050860301144	3.2811518456368973	0.0004313051838247029	0.0004297877840438441	-0.00036315692405869713	5.230349507121499	0.03808322016385955	-0.014899163517908497	-0.00047913863101199	7.003736014300655	0.1004628508386609	0.06942043407796727	-0.01850215775440454	10.350289398097274	0.3972498834783927	0.09887352955563347	0.12710916462933716	1.0503031524640558	0.006218984049913939
1.9580206075532216	0.0004996545823286643	0.0006654366850121583	0.00018190801953745119	6.940444024998253	0.0052692923137643444	0.005480027595839883	0.0014398433819825785	22.901881133362313	0.0714461748346606	0.042324818958128764	0.011169436614794642	70.15105845926944	0.6030240805128568	0.2552425505756036	0.08042175973468016	190.548782757995	3.3446302725947894	1.6896226006473314	0.3859474966266384	485.5663216361489	7.6064102225300045	9.920826422041918	1.5289481310908248	1.3135625075717536	0.00007241098115934449	0.000061018689596168916	-0.00003090275803211872	2.337970148202339	-0.0008509712187287708	-0.00026231131149864	-0.00007498858639695364	3.9062539853690303	-0.00016570952876024172	0.0020327245633010044	0.000028475225071784575	6.130093428380762	0.07978544895473424	0.013326064367129336	-0.005588388186560898	8.639608374486171	0.2235983377479053	-0.05744082567590532	-0.0036334263786003446	11.758562667366867	0.26341382103306404	-0.12896479095591273	-0.061835909011499914	1.3149807864982002	0.008059840403162488
1.4130918921149622	0.0005921665057388039	0.0010292052405942898	0.0002677387919032753	4.928645449150277	0.005974075841717044	0.00872532979804375	0.0020001014961008538	15.75788421813791	0.03650160956571826	0.06737937544284264	0.015299273253118693	45.97309012011304	0.24669653886180803	0.45249656185633913	0.09668467012596534	110.09881708597094	1.4791023519406477	1.9924500716133224	0.5945445008572412	267.7501087218618	9.624942586177719	8.514559830957072	1.8621607900289048	1.1035391622355828	0.000012049844061371828	0.00011179019398825515	-0.000029039099866240878	1.931820920084528	-0.00005193293656914056	0.0000913217075787436	0.0004725704678267405	3.1179721748869618	0.0023966625625440005	-0.005504357473308762	0.00042800528953326343	4.64553772410782	0.024780034536282348	-0.025933758790943444	0.0024084052576948166	5.850653111850132	0.005171285665853336	0.06418686972976807	0.02241635237068537	7.88445670571313	0.3417460078230079	0.2184674242590507	0.049918055799128266	1.1057673362700307	0.008592834056681861
1.2989885242401982	0.0002936908986268029	0.00042589820507741986	0.00011065991565365235	4.7164649874310385	0.003948828253822596	0.0038157000343186326	0.0008900008861889459	15.91504581403781	0.020949654356526647	0.02713161140873122	0.007155029794619157	48.11033412643911	0.12233660012439121	0.17214666095747752	0.038744365585959006	114.69492125366966	0.529145858122144	0.8527645085679624	0.23866138958402153	300.2283934016809	3.565171515456692	5.893516014007126	1.3822831825634165	1.0784047717848595	0.00007059708416200134	0.00004515821411967061	-0.000028098479511046434	1.96266300545183	0.0002710290323423111	-0.0008109794059687913	-0.000011150848091660711	3.328427535351436	0.003400737324283403	0.005222254511954992	-0.0005349822366260378	5.082260634950218	-0.006079954090776819	-0.013541979916664712	0.002851803381879034	6.218527934757839	0.010013665190923561	0.07256892172595725	0.035417059464743564	8.832433834414129	-0.010159377147418769	0.23452520003653457	-0.02049424616765788	1.079558637032657	0.005966938170393585
2.22498707995912	0.0007930614666835387	0.0014154921704693396	0.00021759784467840956	8.156118060935675	0.008751252527603434	0.012973935698986161	0.0032350858226634616	27.92159141817276	0.06347842662427539	0.08008224912329788	0.024716044680514065	87.3726453385809	0.4445600658902904	0.3925744931187896	0.12521041244939288	229.87636333409893	3.336124711296878	2.074571087262527	0.37985935662525055	635.1359785381088	24.38989276119769	13.708877124116333	3.2975637397410544	1.4189117610868403	-6.202209857492217e-6	2.595731680323511e-6	-0.000040502704103964545	2.6098474467755204	-0.00022408207841978853	-0.0014331048613591307	0.000055591871687407006	4.501345812178274	0.0007380585603698208	0.001342566783690725	-0.0017516710745183843	7.149578061398528	0.025547216130242675	-0.0023787501445267853	0.0031849889082499454	9.712154631902708	0.1662000628391425	0.033517489025286874	-0.017237387430588218	14.536693510850137	0.48958023181040883	0.24397427061597438	0.04093698963907595	1.4201539858651413	0.016212028674754124
1.7390957534214433	0.0004660176271011203	0.0006878650109521028	0.00017822883656808307	6.315407089448073	0.005297597887181406	0.006348096425784275	0.0015123506042347453	21.352778496503632	0.03270350339786327	0.046799121271584	0.011717334000805487	66.1997033570116	0.23421233238104236	0.25649377056211015	0.0689551641064404	172.40873845984558	2.240801370743702	1.642635430546191	0.3683631768414637	471.76511238942663	19.286572351146134	6.168267431888289	1.728046739790423	1.2447743192703034	0.0000964338898327912	-0.000028062315413538434	-0.000015593324243740145	2.266471359554228	0.00042357572009601416	-0.0011708015344266123	0.00004680186521022011	3.856889962726484	0.00376063548325686	0.0048177126820448755	-0.0007369947384749691	6.0649271501910675	0.003978765125505681	0.009703181496908818	-0.004550582880851706	8.191903492954221	0.12096313313615656	-0.06615264549175434	0.021313114815540202	12.289389213248036	0.6428322895782425	0.17815246303501778	-0.042003201195067716	1.2461775220365006	0.008789030457912893
0.9972740902881634	0.000671097671800193	0.0010211476084101112	0.00023583136824860282	3.4005193298422283	0.006282483051024136	0.007998179573248915	0.001990087882500185	10.664563358363555	0.036780406031075796	0.04924415397688273	0.01253679638480614	29.988494377489022	0.24629330731179133	0.2805918910486723	0.06550867157991686	76.2732796050219	1.4677417405007362	1.1192692920997533	0.31502529070963015	149.50067078661897	7.910613613386761	3.6318842637967483	1.2998988451136464	0.9067062688671811	0.00020439351057673598	-0.00005928228873064161	0.00008275204005661483	1.5549546882114083	0.00015362104798104316	-0.0007247716698971323	-0.00025054017302777245	2.4681669989653696	0.003372135005890366	0.0024804661304125846	0.0010286374062831562	3.568181533297518	0.018367716576561964	-0.0022794919375693106	0.0026625851578485384	4.791945287944358	0.14993341607370447	-0.05115908840404634	0.000296094402801129	5.434437633056981	0.2529731480039497	-0.25056468918567126	0.021254505547563914	0.908791713411278	0.013024349159069255
1.7416438676929737	0.0005047647538732315	0.0005961016873843061	0.0001943780756226498	6.335299840307889	0.004355391893847919	0.004808780539107308	0.0013853588676790935	21.349480125223305	0.029883855860660467	0.04073414251381267	0.01178762134022776	64.08287100683728	0.21280527401984706	0.32216352805719756	0.06979536074888983	157.1238956079586	1.2219138592761192	1.3511003102084438	0.31128147093936037	482.7785179572093	14.924346161760424	6.310327263259236	2.060636344928251	1.2448119896741672	8.23702440313492e-6	0.00004560928008808645	-0.000036572443980514064	2.2681675106073125	-0.00020629462847823691	0.0001292439367807559	-0.00010062916086251088	3.839305892543888	0.004311823450701651	-0.0014598364459821938	-0.0013925278109735836	5.8382676403047284	0.012167875625914216	-0.016404848650530143	0.006220129679229989	7.458022634078471	0.05515816757390572	0.08463053738509163	0.011648507017136153	12.439654119076687	0.5261444145411556	0.32265368268687045	0.08493187297581106	1.246234596206206	0.0076969459743083755
1.182462373066557	0.0008168453113476965	0.0008988526324200295	0.00029829464426989796	4.071340610556372	0.006771211225525339	0.007269693604684834	0.002245218181726767	13.433438243502598	0.05018614618951594	0.05037363784601959	0.016089146317492656	40.194699355663104	0.29381012898352477	0.298874341704709	0.0947196231635522	98.57559653994137	1.892353989630888	1.6984368296219332	0.45671686913726817	234.33153362831266	10.955303207295835	5.988592362115932	2.222484863334413	0.980704113780921	-0.0003024033383192166	-0.00006409956099569315	-0.00010964281731943365	1.6957093002036294	-0.0007340898834667894	-0.0004710316825189369	0.0001911507318725651	2.8262475854799773	-0.0018748168220022478	0.0013166884667352252	-0.0011201617769543738	4.316755170368131	0.0014198373480522027	-0.001601093331945478	-0.006337430739472607	5.569142023670696	0.0971854558219254	0.06192297746522948	-0.026848023553654017	7.4946218496023285	0.4114896405763458	0.07852314918641616	0.05655475422464279	0.9830893432109163	0.011330922000113753
1.7831295968117535	0.00039413818619614204	0.000605559196547496	0.00015045962235976052	6.4125658268168015	0.004552193902122934	0.005091325913946974	0.0013129958516097566	21.829763621808816	0.027924414368588116	0.03593418148939851	0.009574641446691567	67.8978814992335	0.1800326827777069	0.220989241982655	0.06156344860908048	172.91069884402455	1.065586968386585	1.5225651087575143	0.37358513724318165	465.9327447085728	10.597212715455447	11.607734186283713	1.9247758710053255	1.249648870444611	0.000029382564356114962	-0.000056398580753683836	-0.000032158160824722334	2.2536468723516534	-0.00019225886616046754	0.0002509076830565808	-0.0003284939865544814	3.860935867544704	0.00513545233838959	0.001608422795571301	0.0006531244630679077	6.084220847992827	0.006545045686097377	-0.006204083653784597	0.0039028958468390546	8.014354424204253	0.10340985891000024	-0.025024038463841346	-0.00931582398926435	11.54769018049176	0.4305174159969106	0.03151219396748911	-0.06274878146580698	1.2508496436519045	0.008910721186511714
1.626155196614406	0.0004330385393270704	0.0005732467803301739	0.00014676303889265413	5.819984904454688	0.0044315028237649915	0.0048625311351137524	0.0012806660591495223	19.269974208718693	0.04553410617939333	0.04558954520860982	0.01112865305678494	59.23016509311935	0.31574080931184945	0.22386629241350808	0.06170804519019694	154.61995619864382	1.9061517916131527	1.2307906245292517	0.23270479108776154	479.7011708417799	15.093918132084845	5.31110002258666	1.7290028655233753	1.2037234426038905	-0.00003983881883360989	-0.00011470668029652816	-0.000025687054783460818	2.1601585850709575	-0.00015936817472680717	-0.00013543239119182394	0.00014295289434982018	3.6066205680441805	0.003154957340099966	0.00010645767782573602	0.00029053158678116084	5.628421322636841	0.02673845633165274	-0.021563705725164195	0.013962531170228403	7.531092509746196	0.1514680466839009	-0.018839972481648055	-0.0056119879205231695	12.198865644444966	0.4931583031577589	0.1306138594955038	-0.034306618840836425	1.2050807306196378	0.0073283460304634776
0.8701786140876575	0.0009996195940477355	0.0010567128930002708	0.00026773557612363855	3.105364137116383	0.010422581568387912	0.012064217636118015	0.001888394625438437	10.550168246445674	0.03531910086912529	0.08796283368384737	0.013717250621684494	34.73747854945431	0.15723125251622366	0.369823157704	0.07922145770923004	102.78207682537895	0.656952383741847	1.5463820159989679	0.28362589204185135	346.4879937178586	5.33075066917997	10.528226763846881	2.532780123545291	0.8746288687773347	0.0013311939201068783	-0.0005006762510888438	-6.834609610625066e-6	1.5767440030716369	-0.0023873854065265877	-0.007961421625051758	0.00021059801754769303	2.723832691598511	0.003361171043740055	0.010532258605595708	-4.194326220558852e-6	4.575806171605431	-0.01702666552886402	-0.03287855813721223	-0.005280450795305281	7.0625143704567614	0.027516471804047985	0.029969553668917442	-0.0007100940381780938	12.92330459939555	-0.13290344746583527	0.41915075544610353	0.03266760012995933	0.8777718972577755	0.010445886731102442
1.2613416032082359	0.0006096008540479509	0.0005425556004312572	0.00017284112029245308	4.53015785994058	0.006654503025191494	0.00481199445346828	0.0014008832787190113	15.16793145439431	0.052441756848699436	0.04493064633877895	0.011499774798690604	45.36868357033519	0.37342304372620755	0.2623744631350849	0.09453956641821747	108.918183157292	1.7554277198317974	1.1667874469378405	0.5698581752513827	299.925753525683	12.128390510320513	6.352232594626792	1.9706875999911808	1.03931757570589	-0.00003230026888645086	-0.00006801520394968107	-0.000038252099473134935	1.8729301433387362	0.00018976260033535302	0.0002887724734009659	0.00003313848592709164	3.1651494735517534	0.00305468566918967	-0.0007276413510002984	-0.000542780872632059	4.838390228945465	0.006273840303799877	0.0005004393499901892	-0.005401437750105743	6.072793894360251	0.1067580495158501	0.04519737570382686	-0.012108234212654499	9.13693275803395	0.3092698768968376	0.06592507166242963	0.04746993968665953	1.0410334202107137	0.010172526746765356
1.4073783328700775	0.0003360712760007389	0.00043352489030042596	0.00012016247797690825	5.1061294139060225	0.004726505424560849	0.004128476049946648	0.0011460060415567387	17.36531646149103	0.033197482241954464	0.02680422718788129	0.008677124437578662	54.03698795743905	0.216848748309702	0.1605550875328012	0.06326424710575139	137.4579323728177	1.8235602694102055	1.2276503188583225	0.2797447349561056	380.9792575325213	9.486427339998063	7.17450921998903	2.50921932268668	1.122881051163517	0.000044567539396910095	-5.737633293178899e-6	-5.961222301176269e-6	2.042645197496717	0.00028145456580609186	-0.0002395611668531984	0.000020231385261013182	3.4962959924134074	0.004223059390547482	0.002036334534455806	-0.0004185138576174402	5.5096259250910276	0.028466018516837607	-0.004413662692434011	-0.007850581032712823	7.275053773863281	0.09595572370093418	-0.056279791304429706	-0.0016318647073292664	11.299194731789841	0.4264886363542423	0.2258789256187599	-0.03607445699755286	1.1238383480982632	0.008978924304692298
1.8309073421902642	0.00033295786394592483	0.0005588692519343814	0.00013579848634390115	6.605859421270352	0.003598350405774768	0.004830606430307746	0.0010865874504533838	21.38174425795442	0.024382150503755962	0.03943500225265167	0.008230525511070116	65.15985254393722	0.17441010587844336	0.23832048799234087	0.052202676830619306	159.25732205703534	1.477254908470622	0.9913126719910736	0.2998614401562924	489.82308747918285	11.700844008107214	6.893406808753561	2.326803753982225	1.2834497768773732	0.000057428281279648444	0.000038782769147335424	-0.000022726645139987082	2.3195579260037813	-0.0000756462185140654	-0.00002837287069422205	0.00029534598864668413	3.7720186587624247	-0.0008844329252971125	0.0005336293238298683	-0.001275653781998791	5.810646900606819	0.021970045470211173	0.013057616740023821	-0.004308634496283556	7.340324084333239	0.09094749937668625	-0.07929509523342468	-0.008237084183673398	11.893951337074022	0.395558300148774	0.22274850628740847	0.07268038410069293	1.2846341083862305	0.006824150134383127
1.6591422913118765	0.0005616854617546277	0.0006348862286741976	0.00022108273472210054	5.999043654157678	0.005481300961565736	0.006475511879836941	0.0017343998412196484	20.303083422801937	0.04205628289404512	0.052906139356847605	0.01526436976337347	62.94765666859556	0.3076617531941643	0.36184172530753717	0.0903465216518543	175.8640086473146	1.8704825442835202	1.8451091838707332	0.4482061512931597	534.2718111647301	13.072079048800665	16.42876664602525	2.1563453579210505	1.2118334868147005	0.00005044121443737581	-0.00012501285767225706	0.00011981276621863761	2.1973586717823945	0.000024736253033338716	0.0007909312081597337	-0.0001904234040590029	3.7492146341114783	-0.0012469581799667297	-0.0027730358831586626	0.00010312617880743922	5.926099537356064	0.013683642578545369	0.030735085908256465	0.01419275878169091	8.653916518653144	0.07888468019657231	0.039353299520379435	-0.007930076875853996	14.115750920949292	0.3416585554714741	0.5152653613200981	0.07035889519782956	1.2133607525680559	0.006803869678140484
1.510856843881015	0.0004500369838279166	0.0005535908795337267	0.00016674099105155635	5.506184152293803	0.004252461073711258	0.004856964145698911	0.0013855030346172526	18.703027617491276	0.040040044031054586	0.03541434779527165	0.010678323605984606	57.004376873171864	0.26498624786490416	0.20339291281726712	0.0762719339853568	143.9612518202857	2.339735220711138	0.9047062313930653	0.2808458473484883	397.7966022577084	12.579567424627284	4.21058077516153	2.910012807910988	1.1688172130452117	1.0072468555966685e-6	-0.00011782270343032709	0.000012646768309041206	2.1347943127845874	-0.000014640392005560412	-0.0010117362219495044	0.00020104541063686442	3.648667314522939	0.00013666676713517065	-0.00016629102768050434	-0.00134484150768756	5.6337177972424435	0.02274549143503458	-0.012392523287951356	-0.012162575008536984	7.317270165852068	0.1116574264675588	0.08425557385600989	0.008427580983787512	10.76106224968759	0.3875642035521292	-0.054632629093091016	0.05269769488736976	1.170102792169629	0.0069036958555671645
2.6433228870116356	0.0006530320246838186	0.0008612523135247908	0.0002073248708353235	9.670059192431964	0.010092001471445039	0.008125504031312162	0.0024075624563849114	33.18185283937864	0.052526503239665435	0.05105453359749321	0.01842364008735818	102.95982452889731	0.40506286100515176	0.29336862782580375	0.09735353864185446	270.58534947134245	3.402378689969335	1.9590530960645858	0.5925275968857272	744.1379832967286	18.24660578866409	10.074017861524029	5.487455084290798	1.552638369243017	0.00011110203078465955	-0.000024914234506159997	-0.00003680179141440855	2.848647216201746	0.0003084206573200926	0.0006786582330414543	-0.00019911454501621805	4.914567383197812	0.0050943604070814805	-0.0007487917446978615	-0.0007746962474693226	7.695437211505789	0.032074982161721124	-0.009335978094072968	0.00475552590007093	10.346972996698396	0.1703603324696729	0.008571480831108714	-0.005883390534110596	14.965868507274742	0.5932203915153343	0.26527781434044345	-0.058906692569260045	1.553845842345577	0.01087817806470584
1.7340936326608567	0.00046790224988789935	0.0010308747382643346	0.00026394528580006354	6.314365872389854	0.004470231436204465	0.009782607141238662	0.0019624247120787934	21.323144013071836	0.027903673778687535	0.07522935057288298	0.015258028163070644	64.35722680337363	0.1748349405564162	0.4869846314318065	0.09594753735032485	159.5848922291407	1.4843781375485359	2.716682385964443	0.7550534575793875	395.9072812618862	12.816262562024281	11.17605585010094	4.296686298005624	1.2345399628814484	-0.00012770321975010397	-0.00011226995450185008	-0.00001134005025338292	2.2546287295173686	-0.00036517046083273867	0.0006524066192255489	-0.00028586677398089805	3.834388714064011	0.004404031163351883	0.003095104263212783	-0.0001260526831447413	5.875949085437166	-0.010416862630884517	-0.02541277924163181	-0.0027832967781893673	7.541983127833363	0.04766015564823153	0.045132646182990226	0.0030294251415124386	10.158240755890272	0.42352719791322424	0.05636727956099972	0.02535660265688216	1.2364061839782552	0.006919926990239708
1.8284558451564383	0.0003943011730672677	0.0008488982113800161	0.00016027363217876444	6.4759016041691515	0.003203603036470645	0.0054138962836411805	0.0009757823280039503	21.035253565611452	0.021611941124097953	0.044069217139459126	0.0076313780878857285	63.108095733863415	0.17857418558847082	0.3402350055578428	0.0692038899440352	149.78591457791825	1.425554830593186	2.279793948470488	0.6047082765142042	468.0731015083853	9.73683690419968	12.414426138102128	1.6686547796931717	1.2702800060117276	-0.00003537480195964841	-0.00006974891731918698	1.5305402212489905e-6	2.253468789675825	0.0007137999572775119	-0.0002826171463815869	0.000021461710327339344	3.6788269082271086	-0.000631990708233609	-0.0007332798927694687	0.0003644960963630031	5.602784016448206	0.02657921879599145	-0.00646136083385748	-0.005019928512022532	7.022694088199392	0.06304496715961208	-0.07232290169598894	-0.018473989882617566	11.760810330133985	0.06204736432430344	0.23446990284999455	0.03497597961038482	1.2718385576515236	0.0073442466221450365
1.716972059281329	0.00046793716596364965	0.0006418707375982169	0.00010911518651703806	6.149373626437516	0.00440750779980183	0.004053874866385362	0.00078210102715418	20.503722338752198	0.034738711162901614	0.03597048599145012	0.0072026653648585666	61.48357950768026	0.24615300191089456	0.18761906686273686	0.05355541876694695	157.95368149516773	1.5528923928430598	1.008302515905149	0.2116401730415371	401.5652119735375	9.923882227727393	8.528356583647108	1.707380830495539	1.2352108610323043	-0.00003728465711902821	0.00009647143747660693	-4.142942532720398e-6	2.217426874521789	-0.0013150502498685596	-0.0004403472092811742	-0.0001782905328333373	3.720591571271613	0.0024826776908362836	-0.000053912097115139994	-0.0005098733635872574	5.645394872154721	0.01679960805741796	0.017900234368152638	-0.007985770351517471	7.4453992904210216	0.059112244515049726	0.0022391685560712673	-0.0003940602738882096	10.363976966564413	0.2980433039902969	-0.13124438968563154	-0.06880930114709263	1.2364256432815264	0.010865873834440187
2.0931834908378804	0.0005070520697831687	0.0006838898437361812	0.00011953147688730832	7.531939669050302	0.0039798730617482915	0.004582041635501099	0.0009938365010432647	24.976060024128394	0.034994944397490735	0.04108396849974611	0.010596498655120504	76.05726034748616	0.24550500653108448	0.2508124302088184	0.06933403413433104	192.79200256425162	1.8327174091330403	1.2117296576116838	0.32421478548150345	509.27856052853355	11.255960270796095	8.049954815496374	1.767629329588725	1.3686351464722972	0.000054007287083930806	0.000021039942696090578	-0.00004109779832232568	2.467342760646107	-0.0009050547437243579	0.0006320386710201182	-0.00010542901558639158	4.114884345958645	0.0016459416119457488	-0.0015168763246551293	0.0010571996288849285	6.344930403034125	0.019995116593595454	-0.002386608342201214	-0.0006726788242724914	8.259050945717158	0.12220999937345602	0.011230841879373406	-0.02786867694470764	11.843612024186228	0.33896553202220764	0.19988114925211364	-0.02796250837586792	1.3697669216300217	0.0101825139721795
1.7960532765222257	0.0003483261354904197	0.0007448866298939125	0.00016794506898631839	6.481675634942852	0.003560847003569357	0.0055668874908520495	0.0011975603808313377	21.557517104697574	0.024776373823757938	0.03976860978987996	0.009485282960274179	63.62128818918625	0.17441071641363043	0.321381772602427	0.0697798250968016	150.2574035815434	1.2698527603998087	1.2803606664114247	0.4177375352769839	351.72336191458504	9.02458064498465	7.243338546602775	1.5480151196492424	1.2724852810081035	-0.0000249938843847144	0.000013168258943925726	0.000037640455386267885	2.3004131217812036	-0.00046211552584487814	0.0006858371426786635	-0.00007705467258233516	3.843663304628845	-0.00014043938073418042	-0.0010633909543455778	0.0020236267153697653	5.738795944485087	0.019630114106070573	-0.0069206953067000075	0.004412027682911432	6.9804359191064185	0.07267134569153809	0.0014923149128523439	0.02053811595745164	8.820072250238182	0.4119424838958154	0.0013550225721186352	-0.07152692237236595	1.2737791848756115	0.006233284949434546
1.8257095498355327	0.0006589867342418199	0.0009022169393236879	0.00018739858154639055	6.5129930242045315	0.004321108878416777	0.005409049383477911	0.0013350237115613848	21.66238956008558	0.03260235147405222	0.04334722576691772	0.01182998616453899	64.41699944642386	0.2191496492250154	0.3086065241772549	0.10418102649642204	146.08462244324627	1.1118088427014463	2.1811752948963843	0.375335876965761	407.734482012425	9.631267858649016	6.7119232719784	4.5595220930416875	1.2657509889070078	-0.00006105173042993324	0.00016665527270147618	-0.00007285769302697848	2.2626779011138067	0.0003844323049597744	0.000526012171505058	-0.00019974377776389707	3.7826752994707644	0.00044987103846614814	-0.0033924128794391314	-0.0016419732990664237	5.694319469415314	0.0033315702835318675	0.0015698209910143756	0.005745681871598382	6.7432141393667	0.012784576478243498	0.0697234568733324	-0.006721762210533792	10.1482691605976	0.35953506899304194	0.09530512360249777	-0.14631440202540888	1.2672954580096816	0.012952731882331016
1.2654405301274798	0.0006407574398304988	0.0010253098485404801	0.00026335582690991316	4.301012580082918	0.00466951965109248	0.007282924655230733	0.001940082302166779	13.080072317828773	0.03113058104876301	0.05250774826847039	0.012315824140205812	34.700082759130176	0.1557159572472159	0.3151442399048568	0.07579317288456743	77.98706734229907	1.0128485131904672	1.2768788036211804	0.4730753469462182	178.07912353343238	4.760036344252145	11.101392023356984	2.105996947393509	1.0330370267214342	0.000021645662477311988	0.00011920916444944381	-0.00011201566518611104	1.7614548386645408	-0.0008217099928207526	0.00036637717411253237	0.0005220040078238699	2.700471661995935	0.0009212221758913631	0.0017186866307341113	-0.00013297532494757608	3.650004769163991	-0.00295489187121308	0.008752474584843802	-0.002028043747610323	4.289115665909636	0.04172182918951406	-0.0008635396886595917	-0.03902604683896095	5.882051904035356	0.253679751203908	-0.044923607283283096	-0.08675534621518026	1.03525915862746	0.008693948343104066
1.7800151929982633	0.0004875287119534317	0.0008250699592929775	0.00016004350304191442	6.384790493558327	0.004043025296096388	0.005572255600987178	0.0011445875413876123	20.737946840397264	0.028860477287781013	0.044476403505008894	0.009093801843025894	58.559357068576716	0.1871143379316407	0.2621670772216371	0.0911998055797006	145.19388335117742	1.5037758129467051	1.6055558997494197	0.3833363566905493	459.65092230732967	17.439628300998724	7.173167043446645	2.8838210590071807	1.258197891935495	0.00013035752918956733	0.0002030584144635793	0.000013639402029573248	2.2616850027597777	0.0005419425391357253	0.0006065916284779667	1.0996968090564514e-6	3.6937771373116193	-0.0011694212724006757	0.00022064437496975396	-0.0007100200853162336	5.290925807103935	0.011442897310768354	-0.01770741314940825	-0.0003693197694285748	6.827142746054757	0.09319389847077061	0.01296042555975228	0.0221495377929817	11.930881665474217	0.6788594832484341	0.1509861683435878	0.09411837477728577	1.2596956608514154	0.009326524942233964
1.5124852590640816	0.000549316335351468	0.0007249688909881345	0.00022518513762228304	5.298680917292401	0.004834388452624375	0.005391084391430339	0.0014002752419101866	16.933582987465652	0.036453308607283706	0.046143277267114924	0.009326021182552281	50.82671613030298	0.21571072491043145	0.4185173912183128	0.08186238231316267	157.02008059369908	2.3119603585253223	3.830431369186093	0.5244202235401865	592.4236347446265	24.22424570689968	26.904010561539415	2.8090903016405138	1.1472353161071411	-0.00002351208860292834	0.000021868906438564623	-0.00003287524776831413	2.0152650255608653	0.00007614709623760763	-0.0005305298761512032	-0.0001719880277028593	3.2467457968137583	-0.000407031732944052	-0.0028772198097638986	-0.00046095543027850904	4.979930072875748	0.00831059907906742	0.03771961259291449	0.0006494987268233198	8.126387259154944	0.08822813840917014	0.21248261902351404	0.007401285025484456	16.509494769195875	0.6941307789361957	0.7745801191810009	-0.12111496121890446	1.14883198285201	0.009149009053446405
1.5904756327447098	0.000296799783822088	0.00044832127825506613	0.00008854608481353785	5.7638820311675945	0.0032459054161339445	0.0027047228748585447	0.0005883950866280045	19.516111532500318	0.021321715376217878	0.02149253071591415	0.004358091165963723	60.09323208220272	0.13082682248754288	0.1816691812964067	0.037749068647749864	153.50624494638973	0.9745532487976369	1.0925333581900116	0.234459521590496	372.45639871008046	4.280072696051198	10.785914260380627	1.2240782881920793	1.1884345820130326	0.00006567988144792171	-0.000025058110762509024	-0.000027113800730987595	2.1586013413586365	0.00009505295533480033	-0.00012369555307972812	0.000014143397884051913	3.6738435991816454	0.0026269059430079874	0.00007491460952061117	-0.0007235127634726375	5.71292857706131	0.013916737030474004	0.006111132382242067	-0.001779625524678666	7.4866745185497265	0.06488077873604679	-0.018603329434407803	0.023420384580994113	9.885143879382293	0.26897180790310166	-0.27962397633555586	0.004627249037979348	1.1894735625866164	0.006595412138663958
1.3403666398621108	0.0005046044517584144	0.0007114034759871746	0.0002064007609831594	4.7715408201218885	0.005328857324915829	0.004802952627772845	0.0014766985336677003	15.630806111082853	0.03367728392589473	0.03693419807379037	0.011463049487902787	46.408957789712154	0.2092063651203397	0.2714371804579153	0.08669535460104888	113.406408498633	0.8890919998614714	1.4242741547559112	0.48602886333955575	286.1754229438075	5.532318665215629	9.124249401976446	2.351242106085832	1.0830035819491006	0.00001770365652016804	0.00013234550553913214	0.00003419606826136226	1.9330271545765525	0.0002485408641370429	-0.00014669157566111614	-0.00014821781268717016	3.1864269668602008	0.00024009849408763645	0.0007729067219294139	-0.0012885174452964613	4.801059519887849	0.0023352724340676054	-0.0061165771948144265	-0.0013949367918985093	6.030648320764317	0.023708436745321762	-0.0718517740506779	-0.013892419193633853	8.191999954437996	0.14349433640526302	0.033165833150878614	-0.011574456353863293	1.0847655645905787	0.00831913283825848
1.616940832195213	0.0005615733998315678	0.0010566831314300189	0.00026319787343122693	5.634506655862986	0.004715203636977022	0.007491887568037219	0.0016077731975047964	18.135889387474005	0.04033091511946166	0.05184400678328958	0.012405068978068088	51.39522777198433	0.22591579318655877	0.3235460247992586	0.08471171991457484	133.43607538007274	1.3105846043042242	2.251434870164057	0.443452868054455	280.49038618375243	8.827271463953052	9.866477635392723	2.578560262116073	1.1758931736231482	-0.00020586511525970885	0.00033035985760662445	0.000036617002631136274	2.055513969141748	-0.0013016682480996888	-0.0015171243283647851	-0.0001871808800875076	3.3358256127469357	0.0001683797583789554	-0.0007444237661718559	0.0002530474485425624	4.815611591300649	0.01921591005477301	-0.007806821111454131	0.012243657633311034	6.55331658926618	0.0779625781126788	-0.06530528612389042	0.0012670282750165708	7.5761828190659655	0.2884510249291405	-0.12370809342112832	-0.13399456886249417	1.1779274387244478	0.008757116723842658
1.7386739682230379	0.0003511470787734919	0.0004440220830341622	0.0001083135347595599	6.351900097275802	0.0030096484466671917	0.0030296210409977735	0.0007809042019613646	21.549925116376258	0.031147139295342043	0.022849174255235964	0.007579000135117155	66.02802182855788	0.24615106637933537	0.15485129668294986	0.04316749768689347	167.34600344291812	1.686739129584988	0.79424948691479	0.2341468050614814	433.23189758083345	9.552911992000464	6.419279325988995	0.9943226894998247	1.2404663509475886	-0.0001575541631844542	0.000045173121556001426	9.483748334613606e-6	2.270993367836257	-0.000040779947807949066	-0.00007727709838992136	-0.00017264553563705028	3.875507464462861	-0.00021563153968246875	-0.002565935938304675	-0.00024205451026975097	6.017087122969003	0.00874836903431501	-0.01458908131706461	-0.0047699939424424125	7.875794287324986	0.10679446032410515	0.01928679065168736	0.016797204954368275	10.828638034217411	0.23925798717419539	-0.012017014178039395	0.029239439440169615	1.241501289615778	0.008685182149321194
1.4734191030751553	0.00034902706218236637	0.0004407253120282994	0.0000655822079866795	5.38378565264997	0.003723947208967587	0.0023014502663804342	0.0004832937540712311	18.283196095209988	0.028423693064537042	0.023156751765038324	0.00449933949159218	58.24197911422237	0.23455170344805756	0.20678570767883991	0.05997257670926128	152.34938871954532	1.7104124683726432	0.702648852323817	0.28499534372107077	513.6726067425935	12.079530977176432	7.274417027544678	1.0119964376851949	1.1452488736806254	0.00006110061007671437	-0.00008356292695585158	0.0000436109943244125	2.098310678106398	-0.0005282401180907514	0.0007268829568778111	0.000029420214393141867	3.5908828399016968	0.0025890313674624033	-0.0016178190397763174	0.0002065272016739923	5.824452553113016	0.03797513644069267	-0.013042739441812182	-0.0078913409123659	7.898007402887983	0.15157227173320162	0.010528413475053518	-0.0072576024221798425	13.927087197045552	0.4980395741277173	-0.04804093607434617	-0.03427902096780128	1.1460703862454469	0.010300119744731506
1.7864265388390805	0.0005382984121021511	0.0007362170455140589	0.00017942424483284976	6.369552359424783	0.0046232259825004255	0.004752189218557142	0.001200955218613692	20.938325288433067	0.038099876694809735	0.03523433459214702	0.009707718479223387	62.43944083862275	0.18577387970394219	0.24792595895763386	0.07354579683668652	155.35053914685153	0.9107747299912384	1.533293115131087	0.31335632922218887	315.6199196418657	4.298524386296782	10.274175645627414	1.0828034123344445	1.2454604183095597	-0.00010014127523235793	-0.00004672670743434151	-0.00003843538074881224	2.225119493719727	-0.00033577603222869154	0.00022434064056018517	0.00007494484844304737	3.6770453299209462	-0.000075520034200421	0.00036733928425907537	0.00036486129584619597	5.543499693751592	0.009305376001079245	0.021942107552360434	0.0012768690739999276	7.104206624318469	0.009617295934919862	0.0635080306319849	-0.019170602302413232	8.216329854617113	0.0932678682242783	0.2089891290246883	-0.04072027209452988	1.24698280818665	0.0090460464176045
1.945218956279215	0.000570180124851542	0.0009314600689759747	0.0002041743751726873	6.959619301159963	0.004336385997856058	0.006625744057342808	0.0014109493885839446	23.046570685434386	0.03145244920642797	0.0637801990713047	0.012341393427391534	68.4260205039651	0.18928958449896363	0.29333413856811974	0.10506825037951725	169.08581385702743	1.0754366290639956	1.8765208892734624	0.6742391301908431	435.5370287504663	5.965482365485448	10.737673808835826	1.5019938281540262	1.291259424787657	-0.00007816344143257371	-0.000030580758251492304	-0.00011043271727182321	2.3148105288124796	0.0003237439957532036	0.0005771997512698328	0.00004673788323728255	3.8547730307202026	0.0014665519304034402	-0.0002073761534041042	-0.0010256259680878229	5.789089036085002	-0.0011868112668632872	0.012820282310823898	0.0006547375800847283	7.39357070071475	0.03373573514501134	-0.04191627191216732	0.047024183474011605	10.646146138787593	0.09907912920364143	0.10245231774489327	-0.0655395951452578	1.2930755894478076	0.010317780103962271
1.7880005830943428	0.0005931935992555407	0.0009502037694066762	0.00021525485747612579	6.5449723608218235	0.006824266330049804	0.006880823868449747	0.0014975756092363841	22.505519855482333	0.051655942556650715	0.06039676825030012	0.014155646456580769	70.41882841603744	0.3911814089153485	0.4761900056202737	0.12212089086194507	183.24425829564254	2.1574205335804932	1.6002515790444658	0.5426909979773572	517.9273338201236	12.095262024641176	9.266906605535743	2.418148731916541	1.2570352659778032	-0.000058641476647798166	0.00002101772669556241	0.00002592414554002423	2.3084585450225474	-0.0005086098045406767	-0.00002129143350635408	0.00004603340631610442	4.001477562477192	0.002144692005399892	0.0014634385652763518	0.0002819756055098327	6.3736666282417	0.019252312451497604	-0.008192578440828657	0.0009710171714306301	8.49962676398924	0.15868942147989404	0.019784854369306052	0.01121592081153951	12.668975512518212	0.4467247475328234	0.06802220830199414	0.10237210714846119	1.2586354613000377	0.010499103881145323
0.9202903246202547	0.001278548287133386	0.002931848608299353	0.0005203423375210842	2.9804376117831017	0.025864934182145374	0.015269264853015947	0.003136731800538877	8.92008897509751	0.08639653015383314	0.1303207292734677	0.018268085207594518	26.092695536657825	0.4248983206809417	0.40687595320875036	0.0853841595609146	64.81587826547708	1.494837818331264	2.1996366269191423	0.3992624565256	243.53464615135886	10.968547151508353	14.7169904257281	2.001535575958794	0.855328056816961	-0.0012214569275081695	0.0003415046146758315	-0.00011936381871168967	1.4121748902699456	0.006857545670428402	-0.010119779471411289	0.00009235272802875096	2.178638701429427	0.028145618570788875	0.0053610720990363925	0.0015162742619255535	3.301877722864685	-0.0885204387372687	-0.00481103167020812	0.006045334338023101	4.481825026614687	-0.10939546098926728	0.045635669261906035	0.02740167675020061	9.675593995501407	-0.36084095209511063	0.5876940924282975	0.05830622909256856	0.8592604070837846	0.013988550664429961
1.7579260051472068	0.0004924495911224901	0.0008889837685967184	0.00019786547022530217	6.206857435472224	0.005179884570610971	0.0077996679467323025	0.0016110223437796403	20.269685565416076	0.04022982846458229	0.06763545062215887	0.01234663539181169	59.43884899097102	0.2938896794340982	0.37090664133828094	0.08766161116057507	148.62451509440362	1.728964158728402	2.742887924046814	0.3620319782851272	321.41123716098303	9.726551760683089	7.98634801141559	2.295383699576205	1.226096102971544	0.0001216319298230795	-0.00012616920040600243	-0.00001698075258010805	2.1713110930102335	0.0005080125075502677	-0.0013293805570082592	-0.00004140145633277299	3.5756387359271042	0.0030882739347291026	-0.0047736299921363025	-0.0008047942541305306	5.335876050662249	0.01741125644960719	0.013917429521070498	0.007846082593915494	6.955517819444417	0.07917584562400762	-0.03249573295163222	-0.003016076018471461	8.197933337471902	0.22502293443418497	-0.08748957105902917	0.10516931823550502	1.227874611384716	0.009051063764329539
1.602925620447905	0.0003701122557329057	0.0004960762273846543	0.00012461700022800578	5.887978605878734	0.003860354555145358	0.004278956161947637	0.0011199610477839181	20.135335737530944	0.03781676064735395	0.030669926674908404	0.009739979450958837	63.43386061032914	0.288904769003194	0.21700499422099184	0.05594771225696451	167.47530458552197	2.2733905398857273	1.2271655661018028	0.31176969147729455	470.75413241353846	14.612902965693841	3.4404173469736365	2.2564315706982927	1.2048328074271164	-0.0000735512996102254	-0.00001073751791822656	-0.00009558069101691837	2.2183724350662763	0.00008305512228211706	0.0005062784844683924	-0.00020005161907312547	3.818465945340238	0.0019411658278623244	-0.0024636029968190805	0.0008271099767052485	6.099430532438526	0.030453783394501596	0.007131602274570145	-0.004357686279248047	8.292803358968474	0.13905299375291666	-0.05971221604556263	-0.014527916386217291	12.562595964339236	0.42128978244090926	0.019438250744457347	-0.031674312478245634	1.2058939221983584	0.009257275125779663
1.6912799149704576	0.0003842997486693241	0.0006757543017988289	0.00016604484154634735	6.112437751134064	0.0037221293401125954	0.005866660120297515	0.0014099536161293284	20.18220237308904	0.022669848225127753	0.048467391712407486	0.011364721260466526	61.85155217064737	0.14311379945842384	0.27391980346662015	0.06268697503026699	154.76349989258117	1.7431921881400243	1.0792163536905368	0.40288393428333746	452.1082947231987	16.141052335757518	7.470831224612297	1.4797345223681457	1.228880162754986	-0.00007430795285645986	0.00012921163344347528	-0.000037205262979089914	2.225218221094478	0.0003242713773410067	0.0005036242476373115	0.00020589750013766403	3.694007401213199	0.0005381988280392026	-0.0001339958792946448	0.0015201022724455912	5.740683418047378	-0.0005668061566356732	-0.007380314384018595	0.004723569978511514	7.472985171447682	0.08835213199006746	0.026548651162079082	0.01202287335733879	12.102711683673943	0.44544424835504043	0.19607772898404693	-0.04809913600353253	1.2301907180909326	0.007130876415821241
1.0997358693455808	0.0009624217088836323	0.002181472351221376	0.0003730351648755308	3.8659983255511303	0.0073096707621198315	0.013678316393463577	0.0027433919065478693	12.743957058858353	0.044180322212967596	0.07419210997156574	0.019685703395185376	39.21736495768723	0.23643792584957257	0.6040806947906566	0.11863574231314715	102.43466198163092	0.5232564497147303	3.266093999926732	0.2874570902817804	335.4793983253127	8.018387642261331	12.887027219793316	1.5861812278113974	0.9838646430924184	-0.0003261238231969232	0.002066535513044674	-3.014993940208092e-6	1.7497296043135087	-0.0010430749465962699	-0.007813363274322279	-0.000038222037675398196	2.941205783111416	-0.0010635573469107275	-0.008899403068668777	-0.0008687776442994583	4.680789222808093	0.0004291536517811331	-0.15391432344580105	0.003923024188891367	6.42318611166135	0.004631394165450568	0.11160955223570337	0.012717935023267237	11.541770672048314	-0.20586282365153408	0.1349248495361896	-0.07820081871282378	0.9870782538301154	0.009353888415513765
2.2609046895146063	0.00061569194068198	0.0009139010342719879	0.00024339454876172868	8.08026748351127	0.006492438849253723	0.00682849283796366	0.0017818171215950001	25.874132107512587	0.036142649480868025	0.05011897281724212	0.012575820085062998	74.30975451224796	0.16196514881460344	0.3191985370955487	0.08182254535810618	181.67476570293348	1.1423606078744006	1.8520486374176266	0.518593854379286	456.55064497460626	5.139250179878633	7.2367177255245005	1.621119126375625	1.4231906565430277	0.00006287048499565071	0.00004523310840610056	-0.0000402372210137652	2.549302808240982	-0.00025160340162503486	0.0002276967121617624	0.00026880441393840383	4.10374705257787	0.003925481458819095	0.00047413165844720424	-0.0011696071292311482	5.95914524408423	-0.002543732196917048	-0.020944683176975346	-0.0017855824610810303	7.490902584451915	0.06806867613797458	0.011009052551971944	0.0047521120996326495	10.33652573950427	0.23344114685932663	-0.07428610031789955	0.03679381175890069	1.424768016525638	0.007364185464472517
2.022535405775111	0.0005832363410569241	0.000757297665872103	0.00020573304295822415	7.311259105293807	0.005359569546152607	0.007081410425109995	0.0017400408940442733	24.479658598847287	0.040665906558185215	0.04966735717358754	0.013556025532573	72.16459474530384	0.273694165206993	0.2986475273277093	0.08294813261077308	188.0662324091899	1.4931425112272079	1.3361621433376158	0.3865262058377215	625.1933368964313	27.076944830465806	16.508595963611093	4.692320066252721	1.3512498881711947	-0.00009291872334611972	-0.00003922824988914565	-0.00005436336432942994	2.448075219651665	-0.0001852794238180662	0.0005467916079632932	-0.000276386235484608	4.121102007885734	0.0032193231320402356	0.0006242245186586856	0.0010460722905066642	6.150993179702403	0.01804600247982249	-0.006714077061910407	-0.009013920295566965	8.29030998141298	0.09794200976529638	0.015402629074165026	-0.02229551672468611	15.054261421294852	0.6117873386511208	0.3112422278908353	0.031711981605431074	1.3527912298037985	0.008233432765078893
1.5640789308730674	0.0009250982617511212	0.0007981116970843301	0.0003378922887067937	5.448545809756565	0.007985051220083193	0.006752973694168804	0.0025162348021255097	16.99883239459143	0.05088831184248184	0.041410834789261775	0.017029029142199444	48.43451080986678	0.3663600320296849	0.25849227348366527	0.10521666066948109	133.8729036885356	3.2272112800884476	3.0323191574329558	0.6481116050386589	389.26339699510163	14.084929632653749	18.836409091515204	3.9304948619896622	1.1482497061498227	-0.0001040003851701264	-0.00009359734822699886	0.000018969148146067656	2.0078164768314792	0.00035290841455637954	0.00010584646736003636	-0.00030073932994553623	3.1658041115034568	-0.001256715664097176	-0.00040164125422690125	-0.0020044683499631137	4.620743011873787	0.04668726503948571	0.024047470668485636	0.011021667219263795	6.748002057152247	0.12444275896621566	0.15325714567303467	0.008836537589214963	10.702971830811041	0.4151374365944062	0.47076506667479623	-0.009784491795656415	1.1502970286979997	0.013162318416156716
1.6079895709571281	0.0007775842639167311	0.0009432385672513632	0.0003041182484778112	5.586361721556273	0.0068558755039260936	0.007751891612220061	0.002363000997683299	18.24527429287433	0.04562469407956201	0.052435225928724565	0.01805520548494997	56.0688315294768	0.23331940091346767	0.32478811402964036	0.11140070697454185	138.09374382688117	1.4487470937283349	2.2672617622531086	0.4505423629744004	372.054580312838	17.23428192615173	11.586763158463624	3.212290950769343	1.1652846689553322	0.00006047202209140011	0.00018555852789940163	-0.00009789310412288171	2.0310916710118825	0.0002639157350847803	-0.0003250240467342701	0.0002673390238472323	3.3413150250516432	0.002296294924461037	0.001584625882864282	-0.00024242416534358744	5.20833698892302	0.012823098304022645	-0.0023168098503016563	0.01100178616746711	6.732326910117736	0.01506957897833396	0.013512488429307497	0.0048359846000666385	10.489824693802674	0.39706876805765723	-0.06347102147655777	-0.17787316300845749	1.16739170204509	0.010260697851333898
1.366392977906211	0.0005719180569744894	0.000502467203931024	0.00019662997192307423	4.911972657634333	0.005464184752205258	0.0044229680763323955	0.0014717739346762958	15.891553919622996	0.03762516573253557	0.029569490476643295	0.01096121341203204	43.9629952945351	0.17292072906742226	0.17579149953140047	0.07265082045430464	128.21189254129382	1.8374951281214065	1.552370057049322	0.5377988520497179	471.3397190612259	35.74971211130196	46.59891990580545	9.705703588782066	1.1013971134122487	-2.7482405481085247e-6	-0.00009030837150821788	0.000013097290716409013	1.9846492067394617	0.000434638370834536	0.0003922778058565064	-0.0000890687209043388	3.229974352501231	0.002362566895515636	0.001827806758035057	-0.0009164935366148236	4.539349027497712	-0.0034236045426164546	-0.0006482849771704058	-0.0019877907791722173	6.854847508210599	0.11233487438061573	0.07302642299546422	-0.004137703790680778	14.548709727651392	0.8232928423133198	1.0520092488890316	0.17499526972263624	1.1028493378689221	0.00785079819965789
1.426771362976218	0.0004770301322005784	0.0008284738615503431	0.0001861507730056897	5.115787911630916	0.004573669236907697	0.006274092191645672	0.0017607263805231622	17.115252526817763	0.03362834755205421	0.05104677680011492	0.011531648881711124	51.57572814019331	0.2262092783061941	0.3700228631394205	0.07349153806167442	128.57275246947083	2.2025414469092133	1.4929258891801926	0.38408212861171254	325.44869198945753	13.438516385762998	5.777724298253896	2.0768236279768733	1.1138245990206848	-4.441164622397789e-6	-0.00007734784341048824	0.00014160633770469799	2.00244889340454	0.00018879692239432157	-0.00023897358460222467	-0.00017711319984069614	3.372019186078113	0.0011638264028754671	0.002749626804883131	0.0007372644967831416	5.160877054442133	0.022720786186203525	0.0050491067338092315	0.004853245446417844	6.646478259866135	0.09208220804911217	0.04642425929987701	0.01331255824776617	9.003742301574754	0.24549619261342667	-0.12481550190600209	0.04247249065418726	1.1153995362112161	0.010070630655287505
1.5708886572218845	0.00039295042741378084	0.0005560744710412957	0.00014042644950931974	5.730190251138383	0.0033971940758764593	0.004963607750457575	0.001178005236019713	19.745487583930004	0.03207602581515589	0.04185717335334846	0.008239015452908985	62.03042881126834	0.22768996442503578	0.2870438481342755	0.07238812285253063	161.67475300713465	1.92391430301956	1.3354122290220773	0.2843836308818044	478.40859663311073	18.856962856738257	4.554736461567701	2.221037114157337	1.1850509565641225	0.000010286082108679306	-0.0001329297426358516	-0.000027031659969492602	2.1657434112321168	0.0005032215677561412	0.0005062206777538095	6.899615533741747e-6	3.7527847652853965	0.001514316007018436	-0.0000671480879874111	-0.0013661639137682534	5.987533776416534	0.0011919689486287605	-0.0031834283361359284	-0.00023763431824421188	8.094312419555283	0.15922810642991325	-0.07411696233981313	-0.012873173620488605	12.925421986072557	0.6516856564530688	0.07957046510775559	0.007199009181635622	1.1863420282047612	0.0074492000099281195
1.5857238088739791	0.0006287896013284677	0.0006669360853969438	0.00021332834802141376	5.619039635524858	0.005844122861888632	0.005326054465333867	0.0013621914471436917	17.855610772583876	0.04176984132342607	0.04504742001684831	0.010287214948282327	47.717302233326336	0.18216252503827984	0.22890962905934645	0.07116875293198086	128.61185286530224	0.822047247505174	1.0441304419416684	0.290100611880737	419.8505816437857	6.617187531071747	31.3085447282675	2.981655091951459	1.177151853105208	-0.00003924580222475684	0.00008247521774480485	-0.00012568194295977227	2.091271157785089	9.618357133703444e-6	-0.0000632116093789841	0.000392725233010115	3.3461661196252668	0.0020437506508773884	-0.0033615277914847653	-0.00030636417670790395	4.54564484837753	-0.01152099757952323	-0.001568435840388228	0.0031986351974675514	6.350435260329259	0.0011243457270257865	0.05007664726873295	0.016542720198793322	11.213966393070026	0.06791121801053325	0.9450695977010335	-0.03679691908114114	1.1789036785926195	0.008787057072159658
1.2148520834641905	0.00034340581440575526	0.0007792220086865486	0.00016498688362411425	4.32755863447787	0.0035429981483605113	0.0066983594717129865	0.0013905815404166419	14.259967508968781	0.026779085783947592	0.055448681474882494	0.010255236474243099	42.56615233020762	0.18808034735177598	0.31019125620695687	0.06506750176911802	109.6531458751596	2.101442664058026	1.3800549989402469	0.3889262833337143	430.6772722630606	17.135256654533805	22.574891286583576	2.0929968914891326	1.032771334268921	-0.000027214154136579115	-0.00010102674167600341	0.00001382103822885031	1.845745787079206	0.00029337455110058097	0.0010309785339685622	-0.00017793164187868577	3.068815620540062	0.0015797056213842247	-0.002016461178589234	-0.0016166262299374407	4.666717854865585	0.016891296968460177	0.014132816729875384	-0.005349520968554374	6.314997595787194	0.13276616373856578	-0.055816019450386715	0.01214270791511563	13.167000834785512	0.5650960261188916	0.6045731949638408	0.011841779876476508	1.0342449409715786	0.006346691829773659
2.63945281619259	0.0006110530132687745	0.0006843631260038841	0.00023233295410003994	9.592828239980955	0.009678242811566519	0.005384054413980008	0.00183650025424209	32.69754747783011	0.06632424378699393	0.04461274181940168	0.016619491544378803	98.91498251235285	0.4050559872100684	0.29389427858025213	0.10074500307665492	273.63930485763615	3.4200468332286147	1.4543381790682124	0.40212955484278157	874.6146537819031	20.48638299325758	20.732917185374603	3.6629278776363896	1.5508289112354023	0.00004328512434846717	0.000025777657115746657	-6.319519695303533e-6	2.8263493928611902	0.0008946247701196788	-0.00042347297593912323	7.82204713609336e-6	4.850712886433769	0.005873449037408545	-0.006115119849924047	-0.0008953809477695918	7.43420264931241	0.0031521378369723857	0.004657174957081959	0.008167808635461273	10.609166792811388	0.14943162792090162	-0.03479337436849685	0.009233457617068381	18.12546271473537	0.2683300443420868	0.5554441920153398	-0.06222752659344649	1.5523178724399012	0.00627322101533082
1.4351914691170533	0.0002790901341035984	0.0004611082266886251	0.00009532394029954189	5.210796620277615	0.002521521538661222	0.004840845234571519	0.0010276315462680139	17.508864142712355	0.01696759798469732	0.03483263384722642	0.00868005792677655	53.256116235920736	0.1251375815612009	0.18406792889796597	0.04235151682332058	133.13036046537124	1.337518386785439	0.885381125921821	0.2368919246737443	359.0617937864182	8.953144022152173	4.991416587667892	0.9169371115895596	1.1320757012853577	-0.000012226769539878741	-0.00006770633909556264	0.00002407613971051321	2.058998965698025	-0.0002504532040850878	0.00037649028995313626	-0.000041810918779045406	3.4759923445098235	0.0007109748510486425	0.00021421145242278986	-0.0009491824413949604	5.34193544733367	0.01630214071883773	-0.004491490947700926	-0.0042155040955780465	6.894513006840235	0.05669148384164876	0.02068484449247506	0.0034623735311426203	9.970251464785072	0.3743202017594771	-0.1679533665440778	0.014732572313508243	1.1330187105120155	0.007096750100051167
1.7248758939389535	0.0004506460694931472	0.0006872197472160178	0.00017884016238484343	6.2481343657613175	0.005425270547452559	0.005340575165011121	0.0014726028043689134	21.144039936653833	0.03566336705723774	0.04240943494550067	0.012206987486871079	65.25355374304053	0.2339279266963038	0.28073134077418155	0.07069215932508428	163.6625883403219	0.9474874025653278	1.9577697640464191	0.3500419884210354	449.6865765119684	12.330922527061785	12.335551864127757	1.721233901182627	1.2419825366558193	-0.000029523656700093842	0.00007450958307090172	0.00001026859035617416	2.2563322705234428	0.00018700322807468548	0.00022420505300284172	0.0003145270341096307	3.8464724908257786	0.002462876518205578	0.0015932585818843924	-0.000026717261514428505	6.029704127343288	0.012333851629311346	0.005024127384109953	-0.012255295780427545	7.868020709673353	0.0471265606828343	-0.10254782017608056	0.003984700826131497	11.968231875306886	0.46929659910231797	0.17898878923966016	-0.045803449136306386	1.2433477875614631	0.007754351420025169
1.776119655217115	0.0006317448115416948	0.0007899974456404867	0.00023390901054620952	6.290627353183901	0.00691812274694862	0.006769017968049408	0.0017430917748798766	20.563216589546414	0.04635685517761495	0.05532800894735743	0.014639763801617127	62.018631295457915	0.2899302839163205	0.4183225516807334	0.11007258253936343	149.84132453916254	1.5974409784431205	1.6157687941479988	0.6123536466708742	437.0186698409584	10.494107381051807	6.4621617837323635	1.1031118790067678	1.2508017896055716	-0.00002883619072373021	0.00010050170485343772	0.00005022552340603887	2.2217803055001637	-0.00016089924808477304	-0.00007018397408098661	-0.00030225734485356357	3.6595998942466097	-0.0003248929820679317	0.0017617882961810344	-0.0013487253328329299	5.617619072705414	0.005540168914302382	0.010680788964664038	-0.00367882519403848	7.074550208764181	0.029506363770435317	0.045110518754582614	-0.003865456684929248	11.196749108884715	0.060832280631362035	-0.14138541412112526	0.0601777306688841	1.2525447389715332	0.008424582508326117
1.613967568847214	0.00043399521026639393	0.0007051982224697349	0.00016486294232185476	5.737052166800441	0.0046223905567339815	0.005417065785520821	0.001398411409453671	18.508228009096772	0.025675443021025007	0.03727820730476781	0.010178139056359692	52.19254008573218	0.17149710279140873	0.2567266536825318	0.06586950952455974	131.319078047708	1.266204245612136	1.1161262290774803	0.32239497510762616	408.6600781588372	9.779613868175964	8.714944600884309	1.484270107076437	1.1968701308141465	0.00007927510827503238	0.00011672926425898266	2.94120959018136e-6	2.132557367399039	-0.0004309919715597779	0.00013829339555528246	-0.0002336879982800153	3.4604471876530445	-0.0003161933113853376	0.004187739696301004	0.0011414580808879473	4.9438623907662445	0.027988489092280692	-0.009552922105390105	-0.0036396847576656605	6.424449155028572	0.06198806898133519	0.04030763483686569	0.010208008782605131	10.77685061753535	0.45878475505486926	0.1542378489154462	-0.05537874787280337	1.1981612336658287	0.009395026801928904
0.8485964011952027	0.0016137017487186764	0.0019877497494745944	0.0003816323865413859	2.88567273307017	0.012062413676240148	0.013314375274025595	0.0024585559204492154	9.174945918392261	0.036323000374317356	0.1035944907902946	0.015544330929227064	28.482121582750967	0.2152522584259325	0.37355069517927203	0.09284153715906038	81.17181209915034	0.7418239150058473	1.694335295885511	0.4931854441766081	280.14707843044783	5.268998269696677	11.952941174342312	3.4060217229064107	0.844026416304031	-0.003324098984532354	0.0018201881315479131	-1.7418892709248546e-6	1.4567735978761043	-0.002614574240757863	-0.006699925621481005	0.00032588673063415843	2.3757548750948425	0.006479376816720717	0.0004146100251567002	0.002406265253564974	3.7991474968141965	-0.017983517862500634	-0.03140730101638031	-0.00018127358853069642	5.754173223049663	0.020995077642402403	0.04367361357431466	0.023497186936947752	11.117144886921754	-0.19821874788420882	0.45823727293659594	0.05973171412944513	0.8470307661209967	0.013042168219360058
1.7056625464405872	0.00048295724222321756	0.0012947169084589257	0.00024231514908643268	5.946474644542477	0.00426947480701323	0.010858320242601645	0.001893061401950634	19.114311263680285	0.032301361456407746	0.06884465122943868	0.01457126211662459	55.69452334019174	0.15457169113336564	0.6791290741760877	0.06959804598612168	130.80717904329742	0.7419505171268659	3.250307727540993	0.4134793818581137	367.079762090671	6.755777025762286	11.433556772914358	3.0159422854316347	1.2015556588243494	-0.00014642060119357945	-0.00009364544035494663	0.00007810678185324277	2.101025264207849	-0.000299766962513331	0.0009904449780929279	-0.00019201312694294093	3.4011612869798484	0.002522925952124146	-0.0013884667854586097	0.00013482658066308925	5.052581690397594	0.010937069804332991	-0.014108577988113649	-0.0023324010846083572	6.241632827652808	0.025241240736011902	-0.10807096517854474	-0.03193309215456659	9.769776146412424	0.2966282575100856	-0.164365495671178	0.012702812776345837	1.2036313072430822	0.008513637529720987
1.5690115655622545	0.000365594267189123	0.0005620576934854128	0.00012871449079988832	5.677877439491227	0.0033994621883070716	0.004309733367195932	0.0012212387010966308	19.09029601029715	0.027940188088809496	0.03752093112039687	0.008852150175088457	57.72624375194394	0.17480680546927643	0.21259413177112335	0.062259457797605826	144.29476506496147	1.2071409933527104	1.2022650666964143	0.19316593314299613	402.784736751359	12.829603403730523	5.454389481729808	1.7034677164400547	1.1888547292847145	0.00010028631438895353	0.0000752552892466095	0.00009038724766833452	2.1554333319893613	-0.0006856133804341908	0.000649587361026354	0.00017751509985297623	3.6428380411401684	-0.00037820808761025075	0.0008461806919373348	0.0003414379094474128	5.5746641857112715	0.004609086103709864	-0.02016148186546099	0.013337298018471638	7.183399786460483	0.04168073480832305	-0.07610222731268407	-0.005383492134487682	10.966631614623662	0.4335166478554479	-0.12002772034287917	-0.0028521416995365366	1.1899510006252594	0.00808201775822976
1.1529573349176552	0.0002988157414287054	0.00047787181057848687	0.00011478514640689998	4.145917942520249	0.0028563953578374696	0.0041538224792538065	0.0010401171631833658	13.86487954276181	0.01938758244090565	0.034415613536774546	0.007055787113808237	42.41352298875764	0.12456404048906457	0.22285522538524766	0.052447051609423326	106.70775662669332	1.1395248201878827	1.3452089001977685	0.1705420448319066	281.63532385418773	9.588232647498822	6.209183714858344	1.4738715992733211	1.009145782238212	-0.000029100879085673493	0.00004351540371594268	9.854634960248242e-6	1.8187988870847007	-0.00022274981770495375	0.00044224744091334956	0.00006946271157367901	3.0591106081002937	0.00015924459553368824	-0.0016516334799689376	0.0005473002267209886	4.743641257385779	0.013057853859851963	-0.001568106551220765	-0.002403836977772969	6.1747518412973905	0.12423123906746772	0.057047131005020964	-0.012010823874849159	8.865721167560492	0.47896168215796464	-0.18385504650618606	-0.05831770005167277	1.0102374217156245	0.008278362892576493
1.252608525254174	0.0005083269213875128	0.0006359903958716651	0.00017307479705858377	4.432340987447395	0.005263353629868499	0.005554292219102651	0.0015375301706468197	14.9026463468655	0.031050047770182367	0.04700784138484273	0.012236978560301495	45.66687446705553	0.19309059454204264	0.30955262782485715	0.0752931665949336	116.23319416191963	1.6005894469766593	1.702988554141499	0.423458549403923	316.1883091369547	13.720213800787471	9.589328770571587	3.6595159341397583	1.027770254462169	0.00010698308024087062	-0.00006918045289470913	0.00008104606789196363	1.8248423530923439	-0.00038341358317468593	0.0007964160622422963	-0.0003691073222239535	3.0923036866793105	0.0037045913535560786	-0.0027517278981987903	0.0018506746932001044	4.8181568179082515	0.0022369732056403925	-0.003617862532245248	-0.002550047239807696	6.440094277380937	0.04470143974185561	0.007378306128793336	0.009294359762822323	9.81265977871835	0.40953858222525713	0.01009250829850278	-0.10227174504858477	1.0293832466400008	0.011086229881088965
1.5993941709510766	0.0011864366095478045	0.0019083664230578222	0.00037442682786301476	5.833575431273194	0.012586346969972052	0.018160320738273186	0.004494842870645026	19.849281186566227	0.10392955680666179	0.13391055630364826	0.030753590344561085	61.273667117696704	0.6122874936371894	0.642284025044687	0.2511446482670512	154.6525880522175	2.639434972509816	2.119638662702614	0.8366385168639264	468.54378598373546	13.296905969530425	8.542396711004045	1.6643352261401443	1.1652493355872562	-0.0001154669847699853	-0.00004249551756916811	-0.00008164069935108872	2.1406879099558114	0.0004031789268030933	0.0008902046651813305	-0.0007117763314293433	3.7043927517415525	-0.0005127516328104105	0.009126763080629392	0.002179704157725187	5.897775892266647	0.02482778393246223	-0.015238678753856984	0.007097364953513413	7.82349727979332	0.1496589598408584	-0.012634775812142571	0.06117707316312788	12.756737127767908	0.4006434858957727	0.07515870839073287	-0.07937257804775795	1.1675776570517908	0.018697459602956452
1.7360627967851314	0.0004821221394547041	0.000823646069294694	0.00018946842500590773	6.208974920319712	0.004910098544839015	0.0075047974399594375	0.001749395823998992	20.74577213482622	0.04362678323033671	0.059991133230465135	0.01570411105908565	64.23995017128777	0.2955965011456885	0.3653358803252051	0.10443587845880738	158.99407158380893	2.6751317079500128	2.3264723667823914	0.4324715451452252	482.6561891312966	13.794248182542914	25.817115721707594	2.431022891286961	1.232920461155699	0.00001356624610992938	0.00005386953693520184	-0.00001573186371954309	2.211125742397242	-0.00015925116854801914	0.0006614093233664134	0.00012682104087536212	3.7219085517653396	0.0040587406238213435	0.0011153982455863983	-0.000743918095774523	5.852974886456181	0.01565951916494399	-0.03370522195436516	0.006099202847230106	7.534187151049655	0.1472612771054969	-0.03181864330184882	0.027611792764239692	12.542595393910162	0.5329293114105799	0.14323803586881653	-0.03638699211203668	1.2345118804078965	0.010319031127741136
1.5587879657204144	0.0006728858026193655	0.0008825687429453061	0.00022651115716425133	5.536623933649443	0.006248492738221166	0.006883576697005622	0.0020862833090512724	18.27906995507308	0.04185703033936485	0.05036646563440966	0.01371681685730553	54.51257389541279	0.18492217815593934	0.2800142390272264	0.10140206765327013	135.4977254537096	1.0839679128424735	1.9199686916783159	0.5321528205422634	322.521512750622	6.046111762244189	9.075156175275257	2.6155820553727063	1.1596141818281418	0.00002745805464496348	-0.00013247664684365248	0.00005610579704439163	2.0663510677832035	-0.0009690903572407527	-0.00014122111524851103	0.000024397238281909802	3.43611179214954	0.0017563326320005174	-0.002521260754725644	0.00174815043870451	5.191845798313687	0.0009716424067612187	0.0012463792424883648	-0.005510666677556671	6.6678400080068245	0.060389556582395136	0.018994383716021218	-0.003098488551193657	8.645697768630399	0.017150895651687963	-0.006733425460001142	0.011975431975469113	1.1612052619730366	0.014243773935406276
1.5381474927349188	0.0020196591374482377	0.003811886448677572	0.0006086789970805402	5.056784261917836	0.04074858065458168	0.0322755852575988	0.004071321894327241	15.742970768024398	0.07130024642043924	0.20470343556530038	0.028463569106099717	52.78254080364715	0.3299797209471281	0.8770863577285731	0.15001394056716064	154.51293794334825	2.162493128105182	5.769169830047902	0.9223835840606813	448.19962529869076	27.046925651930508	29.89700488220278	3.700816606800231	1.1159323338500873	-0.001331831788867091	0.0011101387488211432	0.00004920596599020547	1.8649429076689605	-0.004245559631940107	-0.01199377843207531	-0.00023808716971873253	2.9716824409109	0.015674496446440426	0.01011951905707106	0.002495335420303985	5.130113502540058	-0.04611292881983958	-0.08276285618180844	0.0011775087680302428	8.135316529012355	-0.0417211203172644	-0.012030939536683763	0.02093270523832428	14.062030253517818	-0.8284198738232087	0.3251734947974407	0.06814018675523262	1.12205160526997	0.015606244821493897
1.7728306838297179	0.00043913116009133553	0.0009590916645512208	0.00020805813356332872	6.329252067120453	0.004371736985972813	0.008903756182292805	0.0017127606449774432	20.9264099990842	0.03173908861410527	0.06002386697443657	0.013941503310036279	61.91769026651723	0.1512105561181703	0.2991294156615894	0.08652036670406227	141.18891528502857	0.9346408343935071	1.2514401326137186	0.421182153796595	401.00634369754425	10.291351061626168	12.378854121065677	2.9111045757763514	1.2499039642786693	-0.00008393773226862889	-0.00004639296052004178	-0.00007476728195752025	2.2372125212517178	-0.000237430423342472	-0.0003958112770234056	0.0001593907062741321	3.721675072236538	0.0007792761278802716	0.005039516744007984	-0.00031241041607386893	5.5704250266156015	0.010059989014049874	-0.00040397237393379793	0.00977886653551309	6.56302338325509	0.05540060226504455	-0.023333964648185178	0.0013460893776961946	10.036114547335261	0.3849447615747039	0.1212064167844906	-0.012343495574634154	1.2516046133892322	0.008481515803692911
1.4249226074824322	0.0004668001438894961	0.0006606771128243814	0.00017403436778045412	5.145332863761274	0.004364575311786083	0.005717259223385597	0.0013911690627957816	17.00327962590217	0.027085064099481557	0.03953356454805304	0.00991490548324754	51.25354620176543	0.13558478695465684	0.22447300686045393	0.054858234035819575	128.73828203179923	1.7607569604584603	1.905355959548234	0.38698623326606807	357.5665431635825	11.909646137405497	6.714820714219094	1.6532910842311734	1.1331201434284195	-0.00002231599555072114	-0.000034024470725533624	2.570352196624985e-6	2.050940445395062	0.00008255982939829065	0.00010294984240767226	-0.00001334909678269203	3.4090266745371496	0.0016601224049491007	-0.004580294435029023	0.00012378644467659033	5.201446888951058	0.006244896332165608	0.008703461294688318	-0.001408895055292145	6.824563996909361	0.08531882842918258	-0.028127162912297735	0.0031971096410619458	10.278862507711006	0.390240917725206	0.07611335548801804	0.07482844661758906	1.1344909482891417	0.007768671127482895
1.6072115220787235	0.0007083556133312513	0.0010327183555214718	0.00029840690932175356	5.512305718753813	0.005425850323111554	0.008157166004097627	0.00203719035280906	16.90253007962927	0.04112701000315155	0.054551987978343354	0.012650844591353074	48.18522243043587	0.2215486682690376	0.37512632499226495	0.070219022035826	124.36636068816476	0.8358226622774896	1.7979090022825512	0.31208258690778523	255.64198924728183	9.21056177575841	8.033373357123422	1.17490818122875	1.1560640247241836	0.000041786744483820745	0.00039800563787816527	0.000019884444417509007	1.9894461712357256	0.00036792196873965355	0.0001110104759424525	-0.00012088629650562307	3.075079346900667	-0.001463214144498766	0.003535927302424101	0.0015420654756273836	4.467215175368537	0.0009763247414647001	0.008479141278422453	0.0014057673788793793	6.010485512962507	0.05834802755572962	0.02381574978187461	0.013216405856137002	6.7745059740629205	0.28735984027813766	-0.25555538821693513	-0.033093766954828054	1.1582102327554589	0.009604543455348483
2.6693454124187754	0.0006090394163047108	0.0010071032971368703	0.00024141521307688757	9.550602952420771	0.009893230377577689	0.007966757154479066	0.0018496326707167733	31.682810012277248	0.07090008836642286	0.05057839191124542	0.014822547429906782	97.3211805632717	0.4733631726923783	0.4237126714797213	0.13060009769276548	252.21119093417107	2.5707818328062113	2.152019182542063	0.5371492208272691	717.4900654315161	11.594011539991925	11.210635490631423	3.36654721138997	1.551559039990513	-0.00003853391165335307	0.00008019366935950887	0.00007458728242170417	2.785312148964471	-0.00018097041890960448	0.0004128971047382502	-0.0001890940521490009	4.657950844471624	0.005623651149815098	-0.0022431211824386257	0.00026690592386647557	7.271659239408577	0.04186700133641261	0.017200206950971377	-0.0020154201923544062	9.702502752777393	0.1279474654581536	-0.017145514385032406	0.008421080647624491	14.730694587686637	0.4748265484740682	0.3674317605571136	-0.04939836512849707	1.553228277472434	0.006273994321125466
1.2035783060950676	0.0008974627384512533	0.000511236322990113	0.00013804476821802777	4.353274448599555	0.005884946490743568	0.00491801837452055	0.0012667655265998006	14.744580373360778	0.041773775823948374	0.029916852054329354	0.010952393896501298	44.291632431274586	0.15674964279530462	0.22967318759960517	0.06533034689967829	121.14384672856345	1.1805057921891862	1.6697422210977682	0.36582029922833076	373.5591746628172	13.338685226412021	11.478850203500475	1.4067395798575906	1.0328264399716562	0.0008963264051730125	-0.000035265224830204125	0.00007266639010008021	1.873433540236246	0.0005791405599852937	-0.00006442301696578537	-0.00025189497727888066	3.1949311439075916	-0.0016572250919518238	0.0017123451968222808	-0.00036992337156527825	4.871931538178585	-0.03466901874390194	0.0033576602055626795	0.007665027341709168	6.950318151247738	-0.03152696054320569	0.031923855256813405	-0.04454183442073739	11.83771977117107	0.48618533892652843	0.4265347998986581	-0.11029583954540226	1.0346392534231799	0.010559556507890226
1.764693911644323	0.0004699963867694867	0.000659713220933533	0.00015779849424147894	6.449534952346428	0.005041588721609151	0.005895970560404742	0.001324070245428068	21.76330593438846	0.03795967063041462	0.05319355536047927	0.011385766970101126	68.43841474940889	0.22465146162895602	0.3142997026159768	0.07796964697420453	177.99937767061604	2.66774922000078	1.9786382007857495	0.3565556345241543	508.19572865156425	19.936252493663478	13.906486536116214	2.846904993974571	1.2536717977197438	0.00005963296761845368	0.00009606261640687947	0.00005933988073534377	2.2962679875551983	0.0008069852564496226	0.0001211665490069001	0.00008213352754076087	3.8981347737993226	-3.6712220403349804e-6	-0.001978525414080014	-0.0005653406872235499	6.211089770200333	0.014013884680178097	0.008548077275883357	0.0008596925513714948	8.381241365950203	0.09565006964327342	0.04755772172999153	0.009979094444745052	13.01738763931623	0.615942724351958	0.24099845335333162	0.02608510829282548	1.2550361850304494	0.008575599107338768
1.460569394593464	0.0003478996646468472	0.0003848726025067251	0.00010780926485570032	5.3044037198685485	0.003560289738180275	0.003660648574832315	0.001053698630095326	17.846080942887117	0.0288453446869732	0.027793406616285887	0.007348330367092601	53.82272293299293	0.22274977267802232	0.21768097473946277	0.06422286107425078	139.73262744045223	1.9082113126482303	1.3679492468650456	0.3653508990954731	403.56008711115373	11.446082899894455	11.86094519708901	3.207452874813658	1.1391018185639252	-0.000045418868180368225	-0.00006879924584325427	2.46456867417423e-6	2.0726895918187247	-0.00016217420645601695	-0.00016158052877769877	-0.000017214803177877066	3.5055928155338147	-0.0014462945657737235	-0.0008286797556268688	-0.0007599544584715603	5.361060247911378	0.003349552288976057	0.02932722568151048	0.0032228340555881486	7.233920033426234	0.0912062943472123	0.008881368790668604	-0.011929481764645014	11.378964690453069	0.14090137819629864	0.5081073570902638	-0.00815689417197119	1.1401091784714956	0.008263315865885017
1.593285326502893	0.0009295608565319114	0.0011594230357931433	0.000364745448612964	5.400665998929751	0.00904862763104074	0.009376398526495286	0.00256403990870939	16.373767707497617	0.058865468980245056	0.056553353852284105	0.019071297724985434	46.27499476072625	0.3790585969928312	0.3581617378761408	0.12114849618133605	126.8349877699223	4.5876021428616145	1.5008869370154354	0.5752265685950102	311.9333318534835	21.21047399211747	7.050821280272063	3.375888549257125	1.1322315446666467	-0.00027338430879482494	-0.00024331112594684008	-0.00008500634026744461	1.9278665069585614	-0.0000704945817352752	0.00035255752657016636	-0.00026482341065454994	2.9578144033783613	-0.0007653371010855985	0.0011886184782303	0.0010974566275546145	4.299197657116355	0.020880259634468396	-0.0023372703844113246	0.012072765093383224	6.143918065460272	0.2872944411785256	-0.034377624828097975	0.04841801544521915	8.197073951840462	0.6584998903990416	0.03992866520054389	0.03821717297546396	1.1348583541054384	0.012729389542721936
1.2270039447555516	0.0018576078979484732	0.0028045502411067837	0.0003867797712595768	4.424489389462332	0.011565938569418517	0.013213776914704826	0.002955308781803682	15.042811110021649	0.0793938038880014	0.15420748446043944	0.022151942369421668	50.87797008959692	0.37611930235800084	0.4502856389324622	0.13559693927550406	150.5523972776446	1.3579997350215307	3.2494728632290086	0.740498431254999	545.3032291197411	4.595330346560076	16.96665121550658	1.8965986136716975	1.0398680702159324	-0.0008638875607174238	0.003944953371451786	0.000013605095479432247	1.883120054656608	-0.00003838487586229054	0.005755550035511325	0.00028522612630908035	3.2478902838763704	0.000946801867549265	0.0028542292740155292	0.000056163575999885894	5.579787980889057	-0.022957350831462192	0.04909182357404163	-0.010619327988138213	8.710583200419727	0.05142273093643428	-0.07238175173755837	-0.0008830920159415299	16.6095737259659	0.11624738658671896	0.7067609156069798	-0.007731961754276084	1.04352335260073	0.014494805481242476
[truncated: 1,102 more columns]
